# Supplementary material for: MicroRNAs of the miR-17~92 family maintain adipose tissue macrophage homeostasis by sustaining IL-10 expression
Source: eLife journal article supplement (doi:10.7554/elife.55676), 2020-11-05
Supplement: supp [file elife-55676-supp-v1.zip]

Archive with 18 entries (18 files):
- elife_poa_e55676_Transparent_Reporting_File.docx
- elife_poa_e55676_Supplementary_file_1.docx
- elife_poa_e55676_Supplementary_file_2.docx
- elife_poa_e55676_Figure_1_figure_supplement_1.tif
- elife_poa_e55676_Figure_1_figure_supplement_2.tif
- elife_poa_e55676_Figure_1_figure_supplement_3.tif
- elife_poa_e55676_Figure_2_figure_supplement_1.tif
- elife_poa_e55676_Figure_2_figure_supplement_2.tif
- elife_poa_e55676_Figure_2_figure_supplement_3.tif
- elife_poa_e55676_Figure_2_figure_supplement_4.tif
- elife_poa_e55676_Figure_3_figure_supplement_1.tif
- elife_poa_e55676_Figure_5_figure_supplement_1.tif
- elife_poa_e55676_Figure_5_figure_supplement_2.tif
- elife_poa_e55676_Figure_5_figure_supplement_3.tif
- elife_poa_e55676_Figure_5_figure_supplement_4.tif
- elife_poa_e55676_Figure_6_figure_supplement_1.tif
- elife_poa_e55676_Figure_6_figure_supplement_2.tif
- elife_poa_e55676_Figure_6_figure_supplement_3.pdf
