# Supplementary figures and images for: MicroRNAs of the miR-17~92 family maintain adipose tissue macrophage homeostasis by sustaining IL-10 expression
Source: eLife journal article supplement (doi:10.7554/elife.55676), 2020-11-05

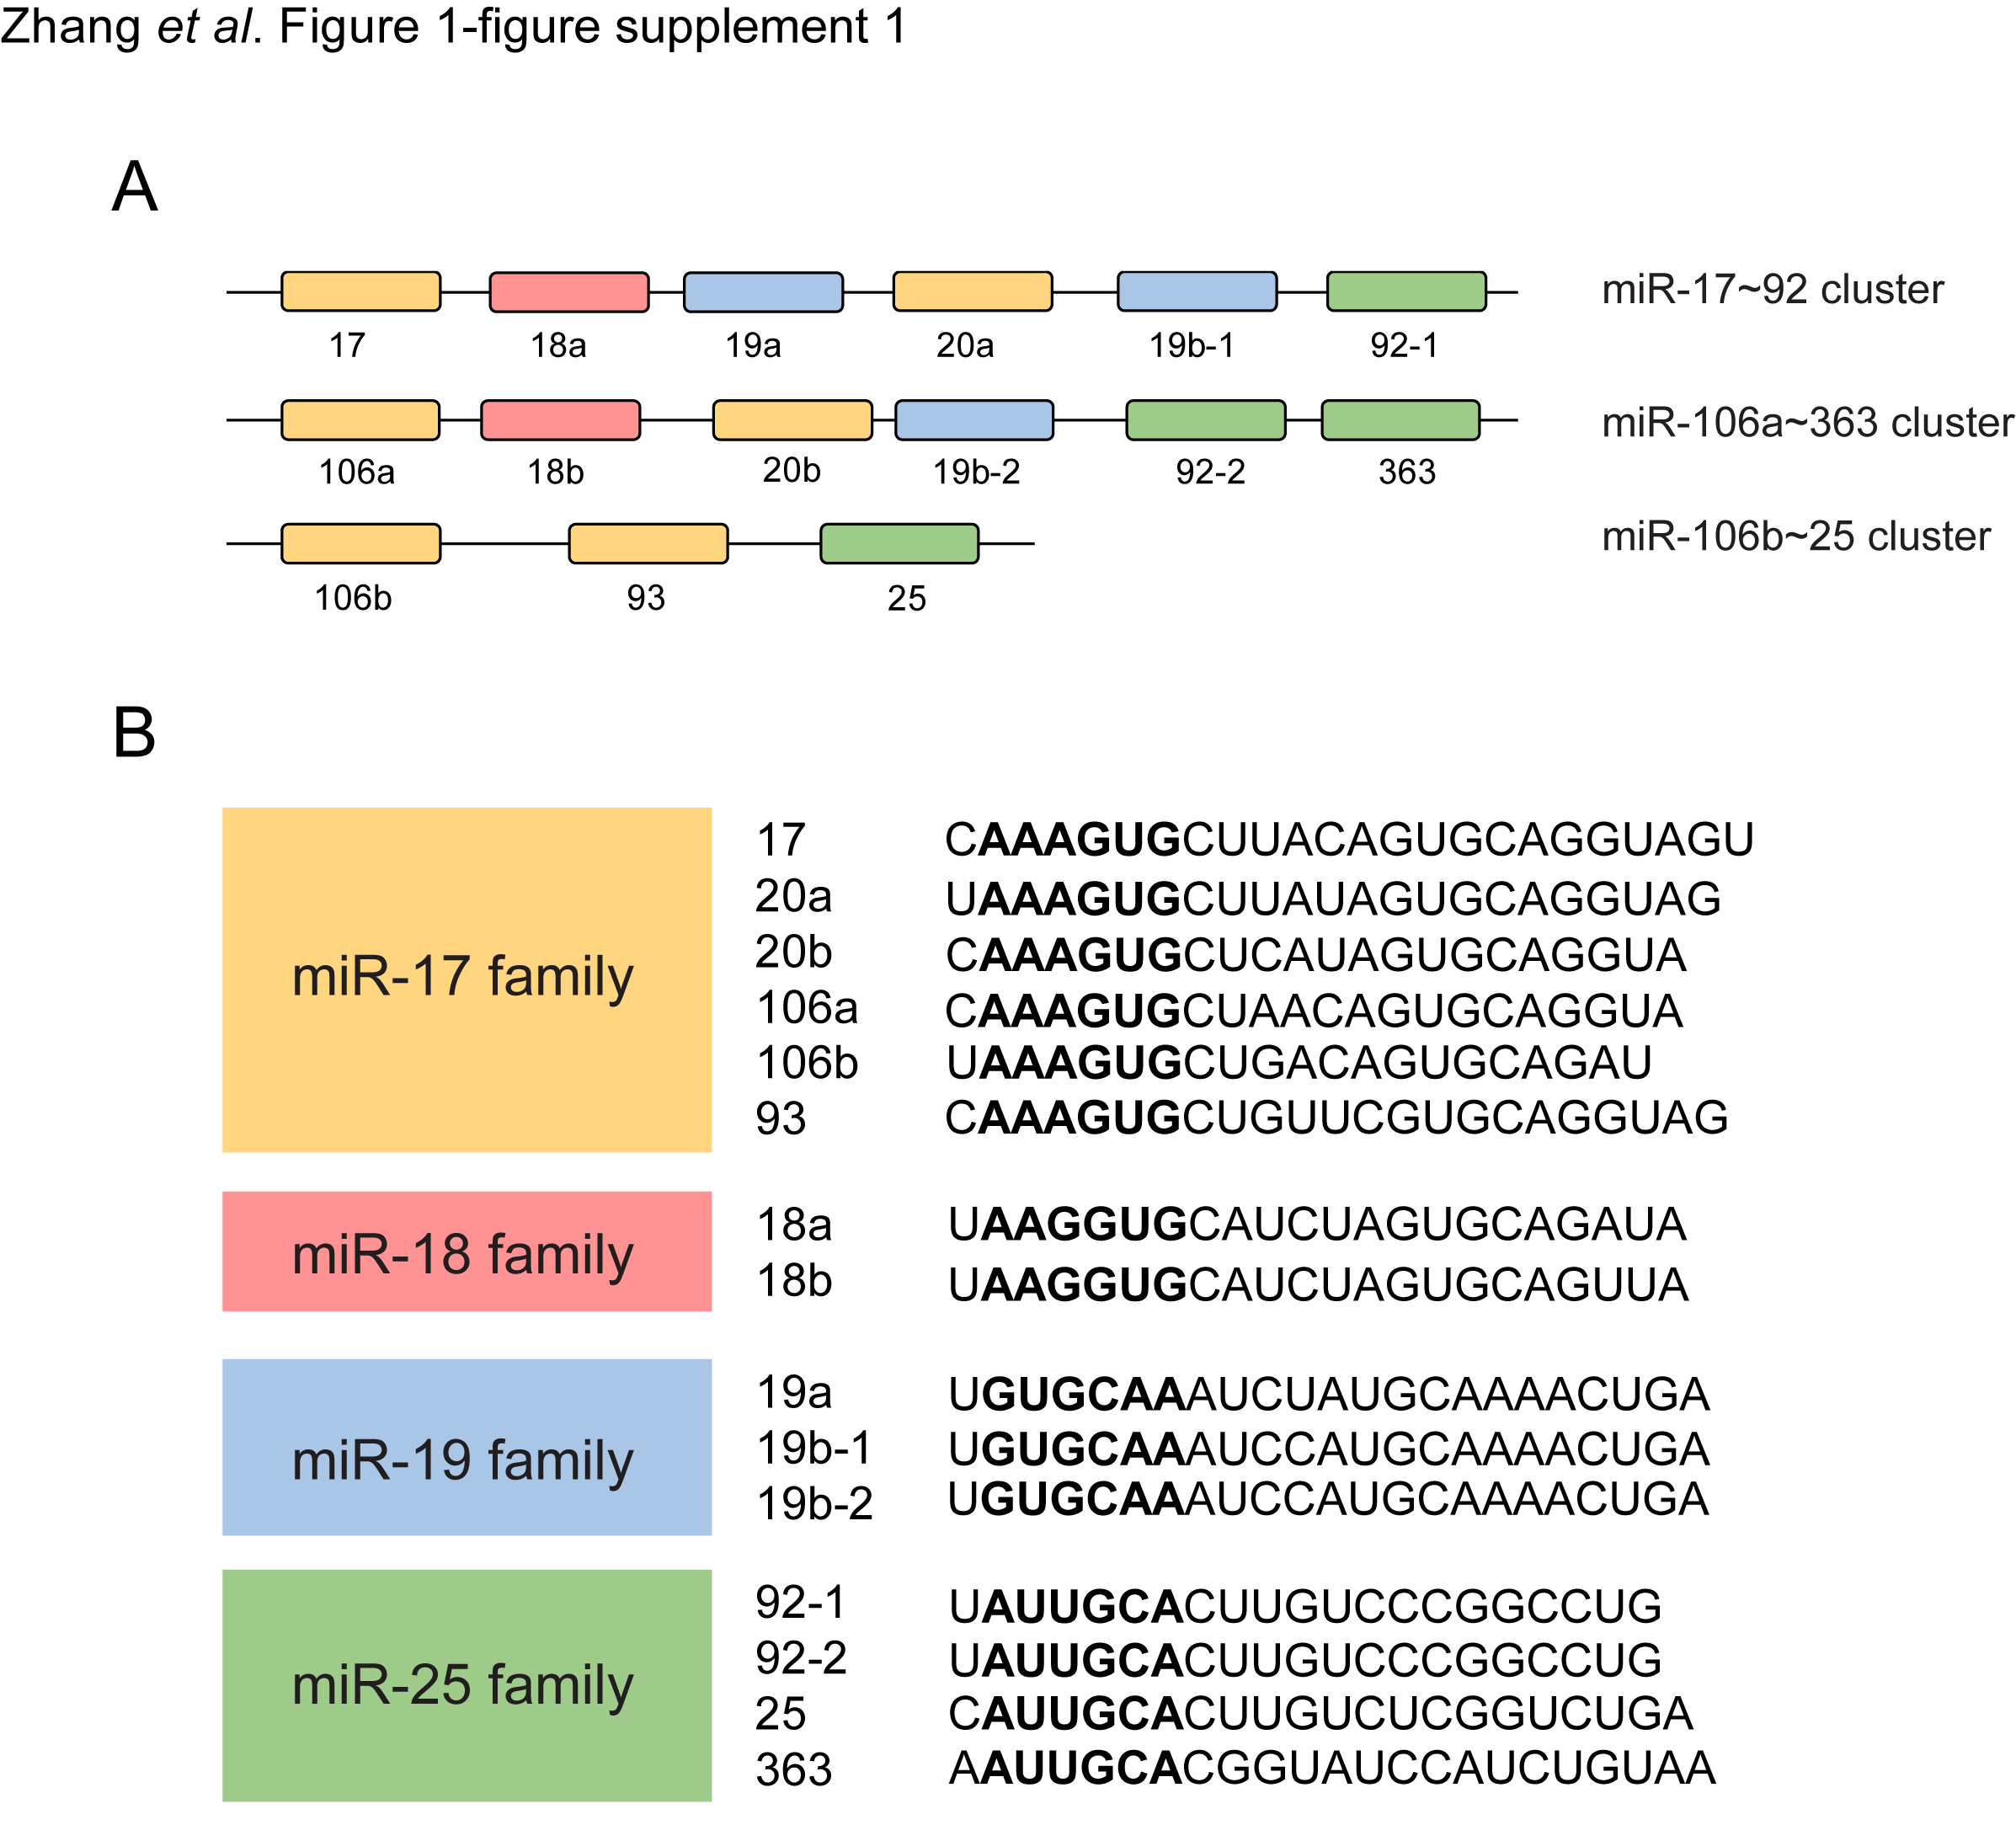

Supplement: supp [file elife-55676-supp-v1.zip › elife_poa_e55676_Figure_1_figure_supplement_1.tif]

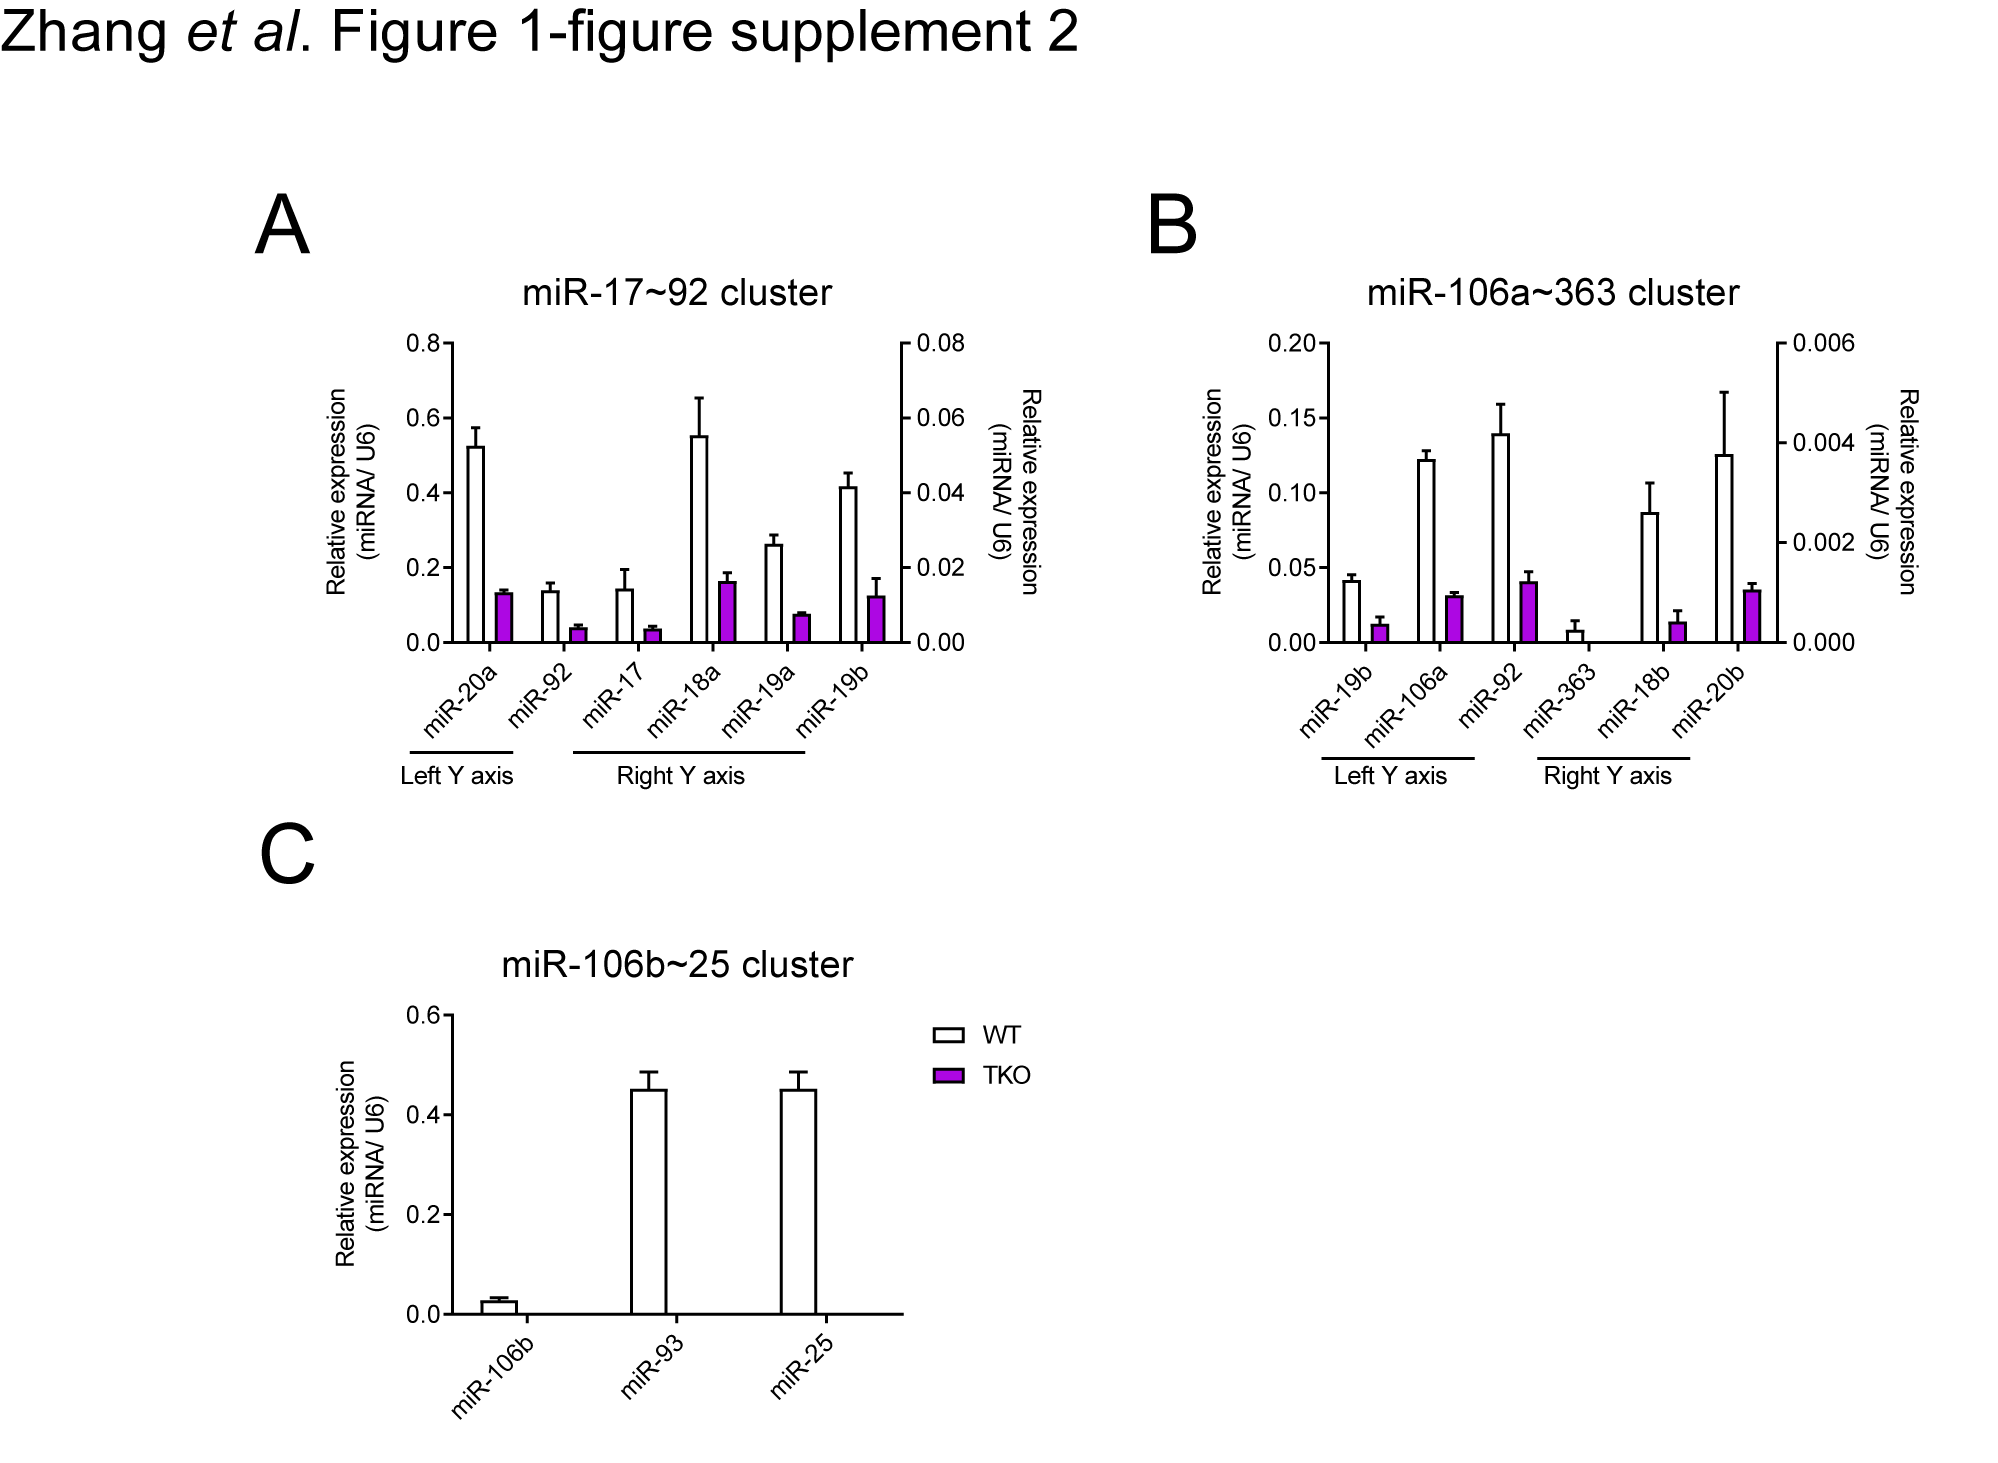

Supplement: supp [file elife-55676-supp-v1.zip › elife_poa_e55676_Figure_1_figure_supplement_2.tif]

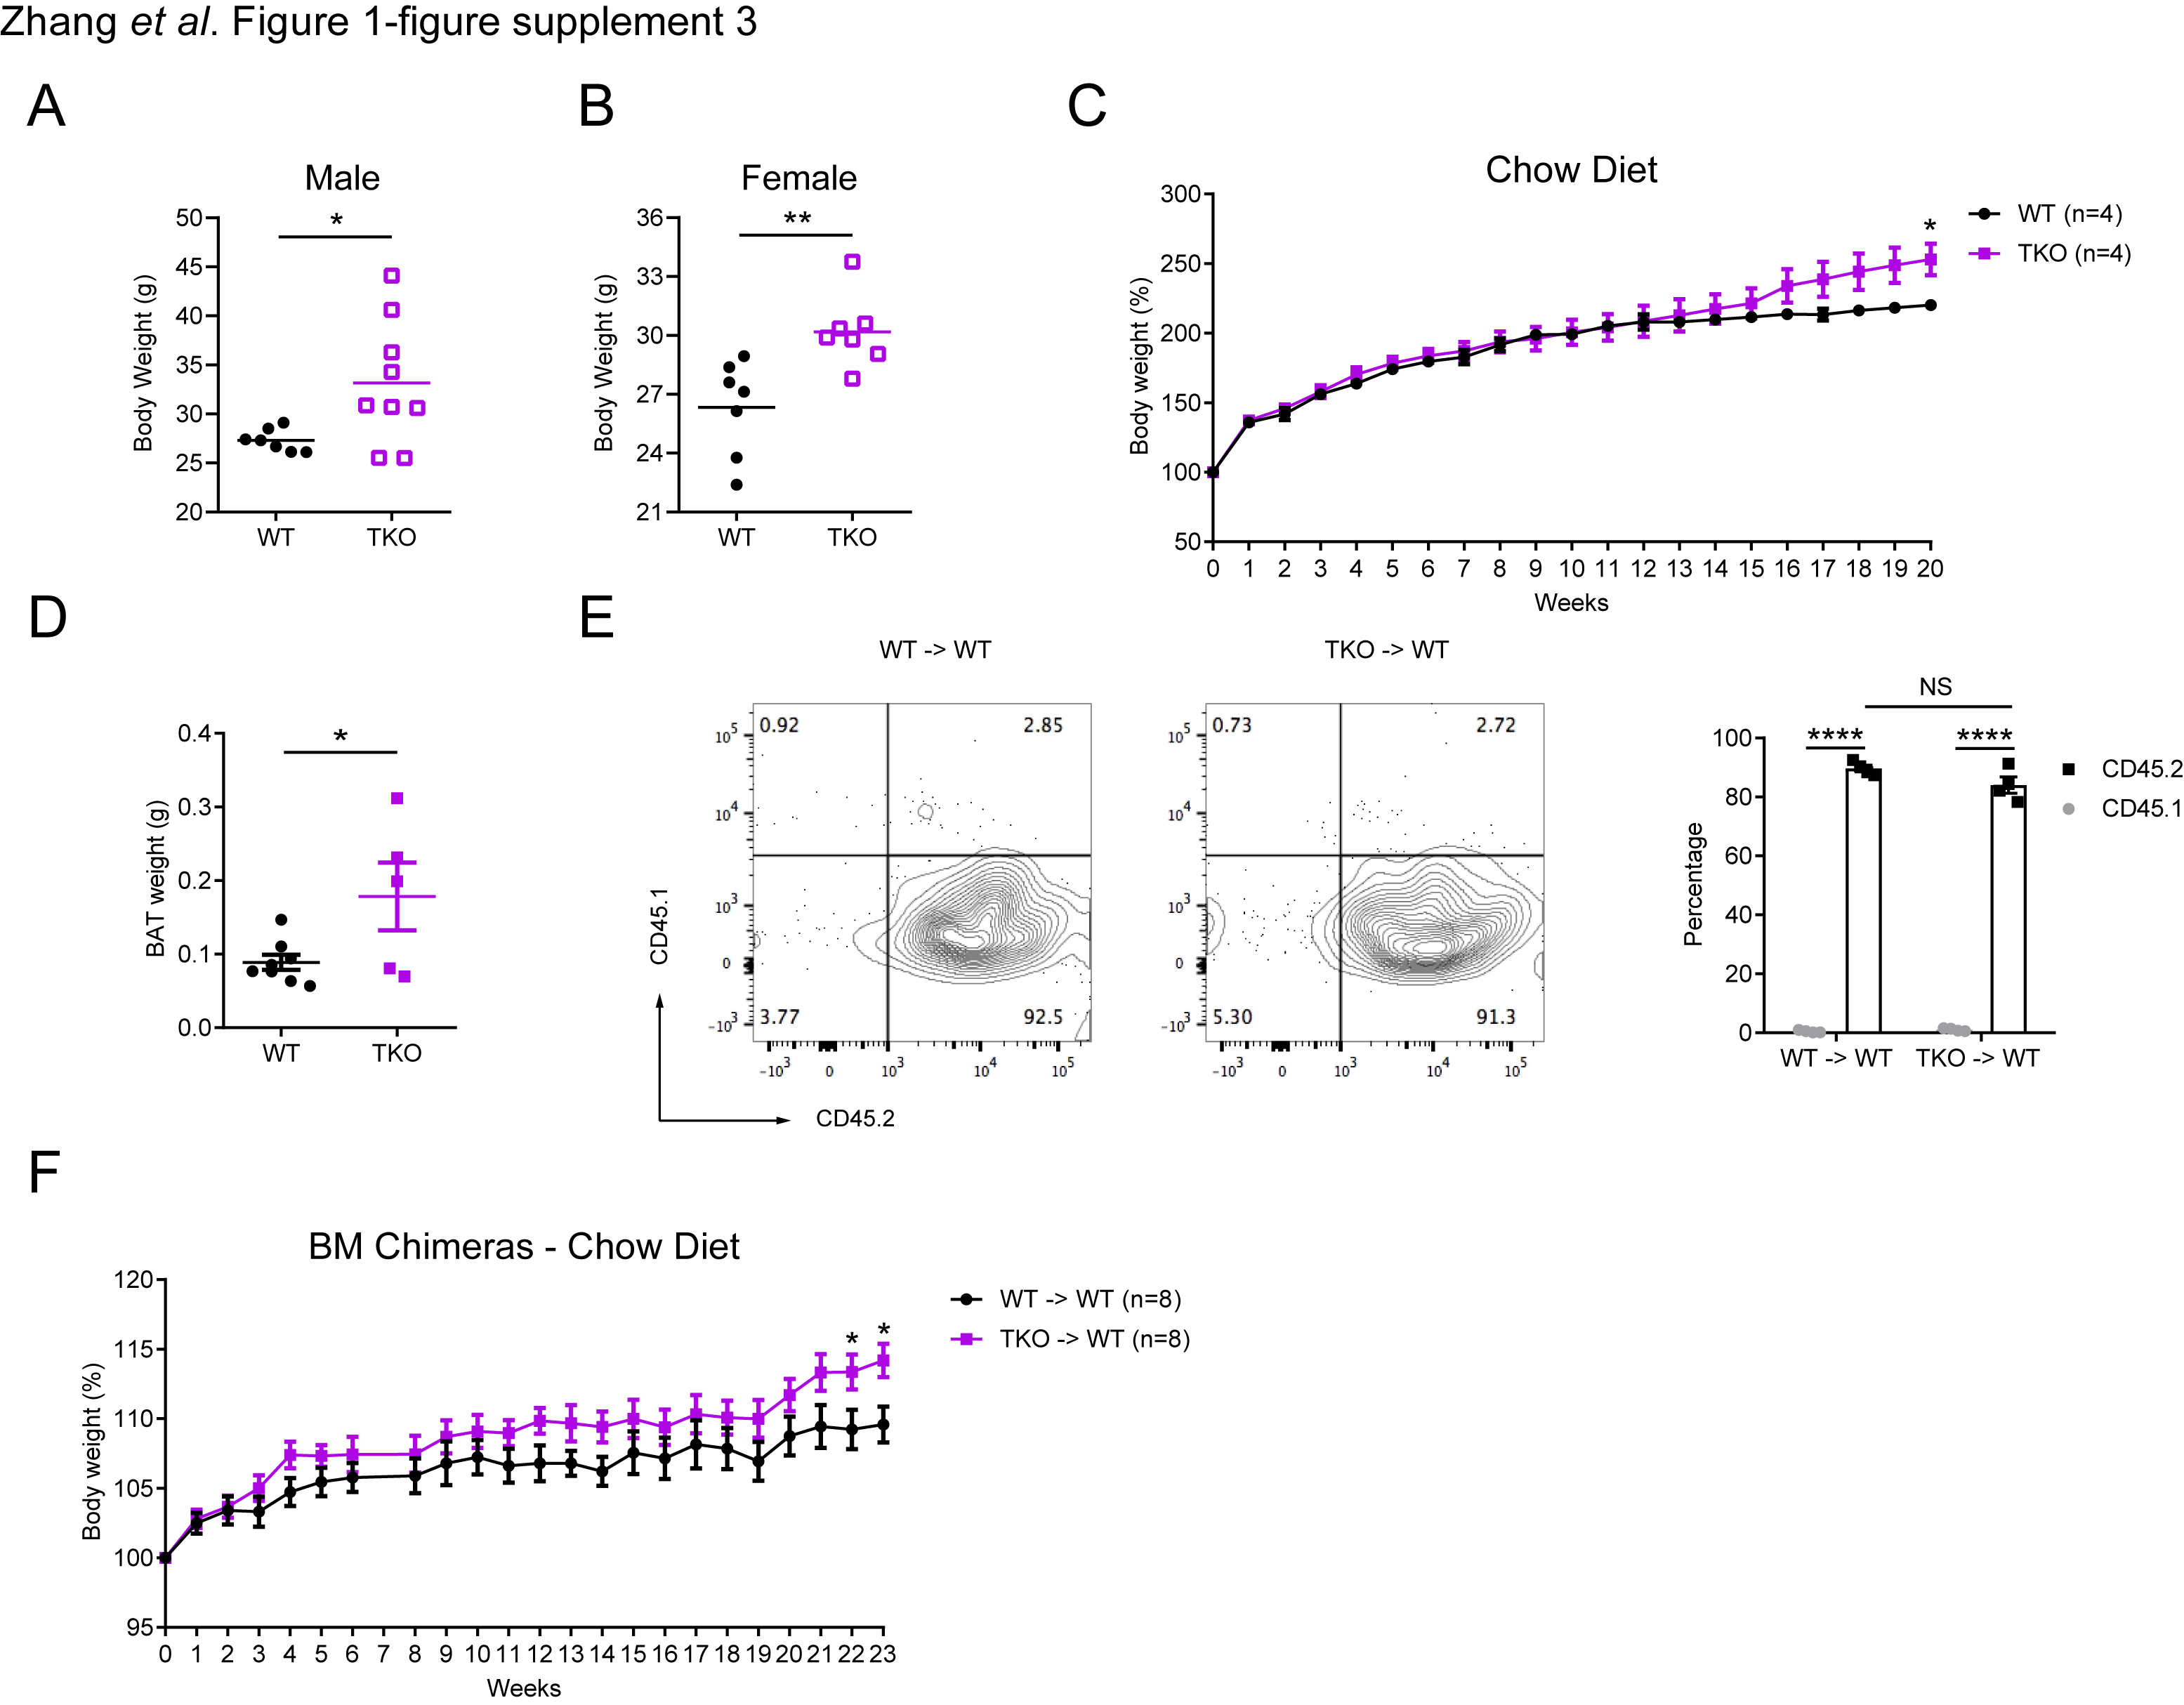

Supplement: supp [file elife-55676-supp-v1.zip › elife_poa_e55676_Figure_1_figure_supplement_3.tif]

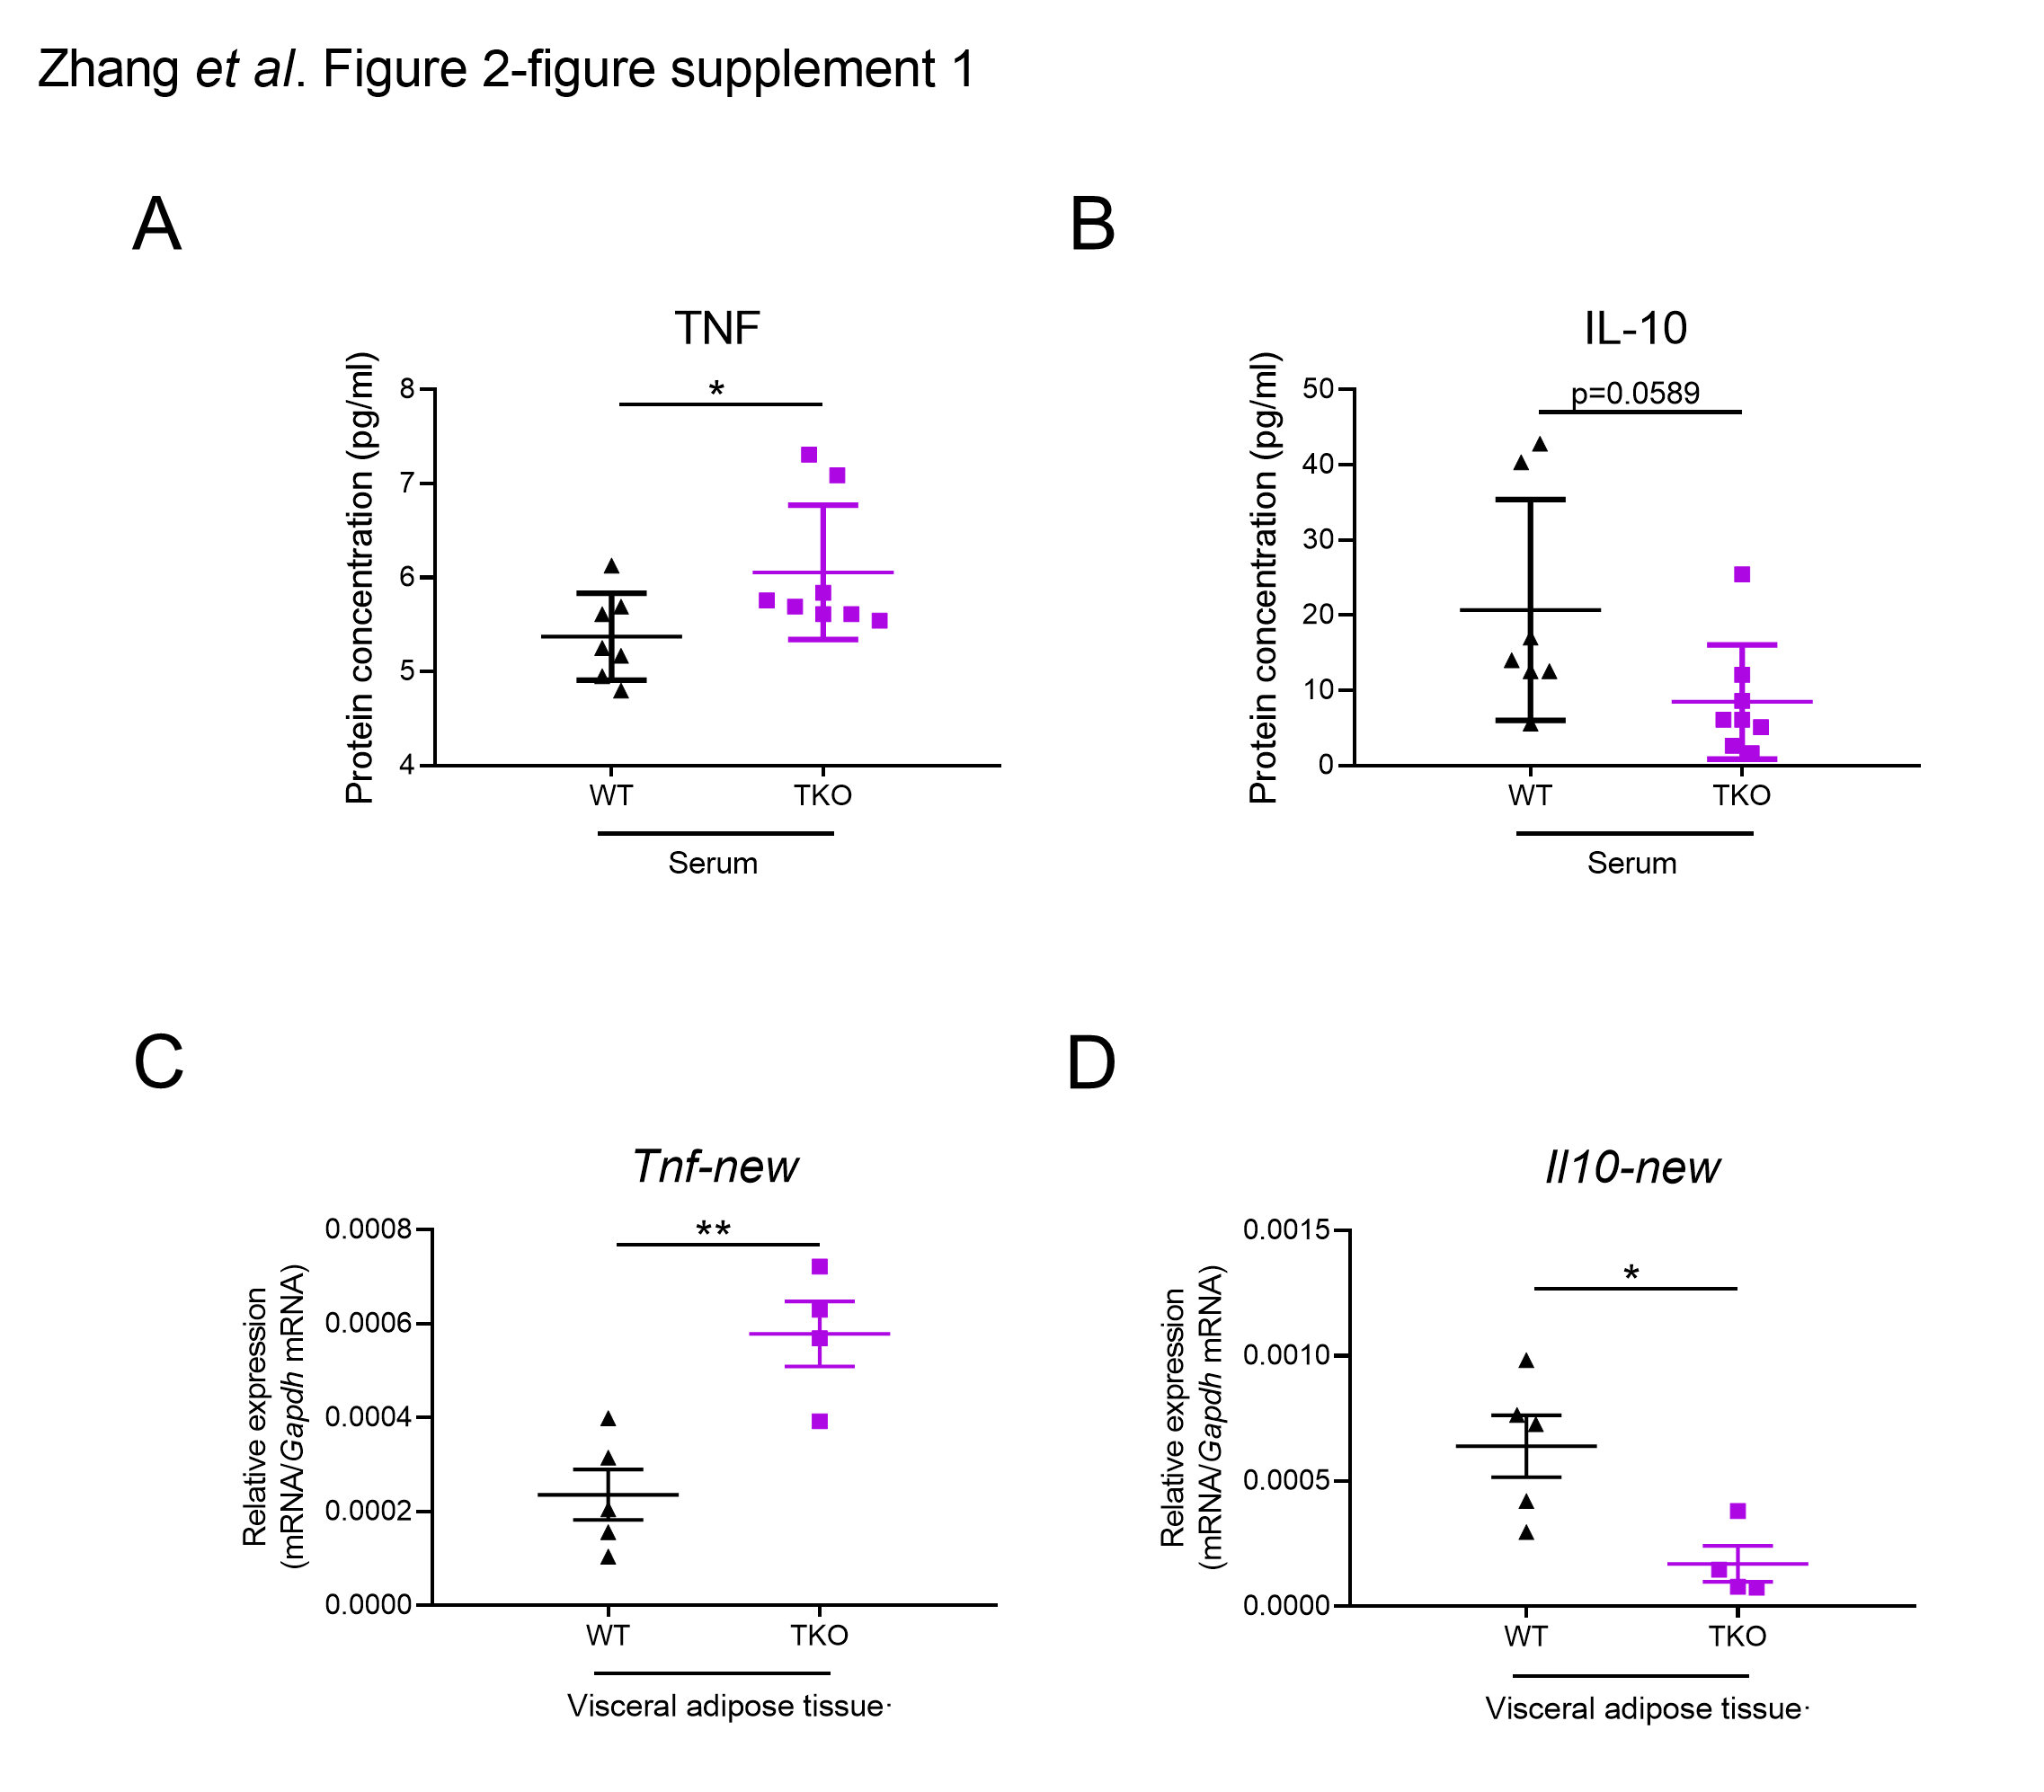

Supplement: supp [file elife-55676-supp-v1.zip › elife_poa_e55676_Figure_2_figure_supplement_1.tif]

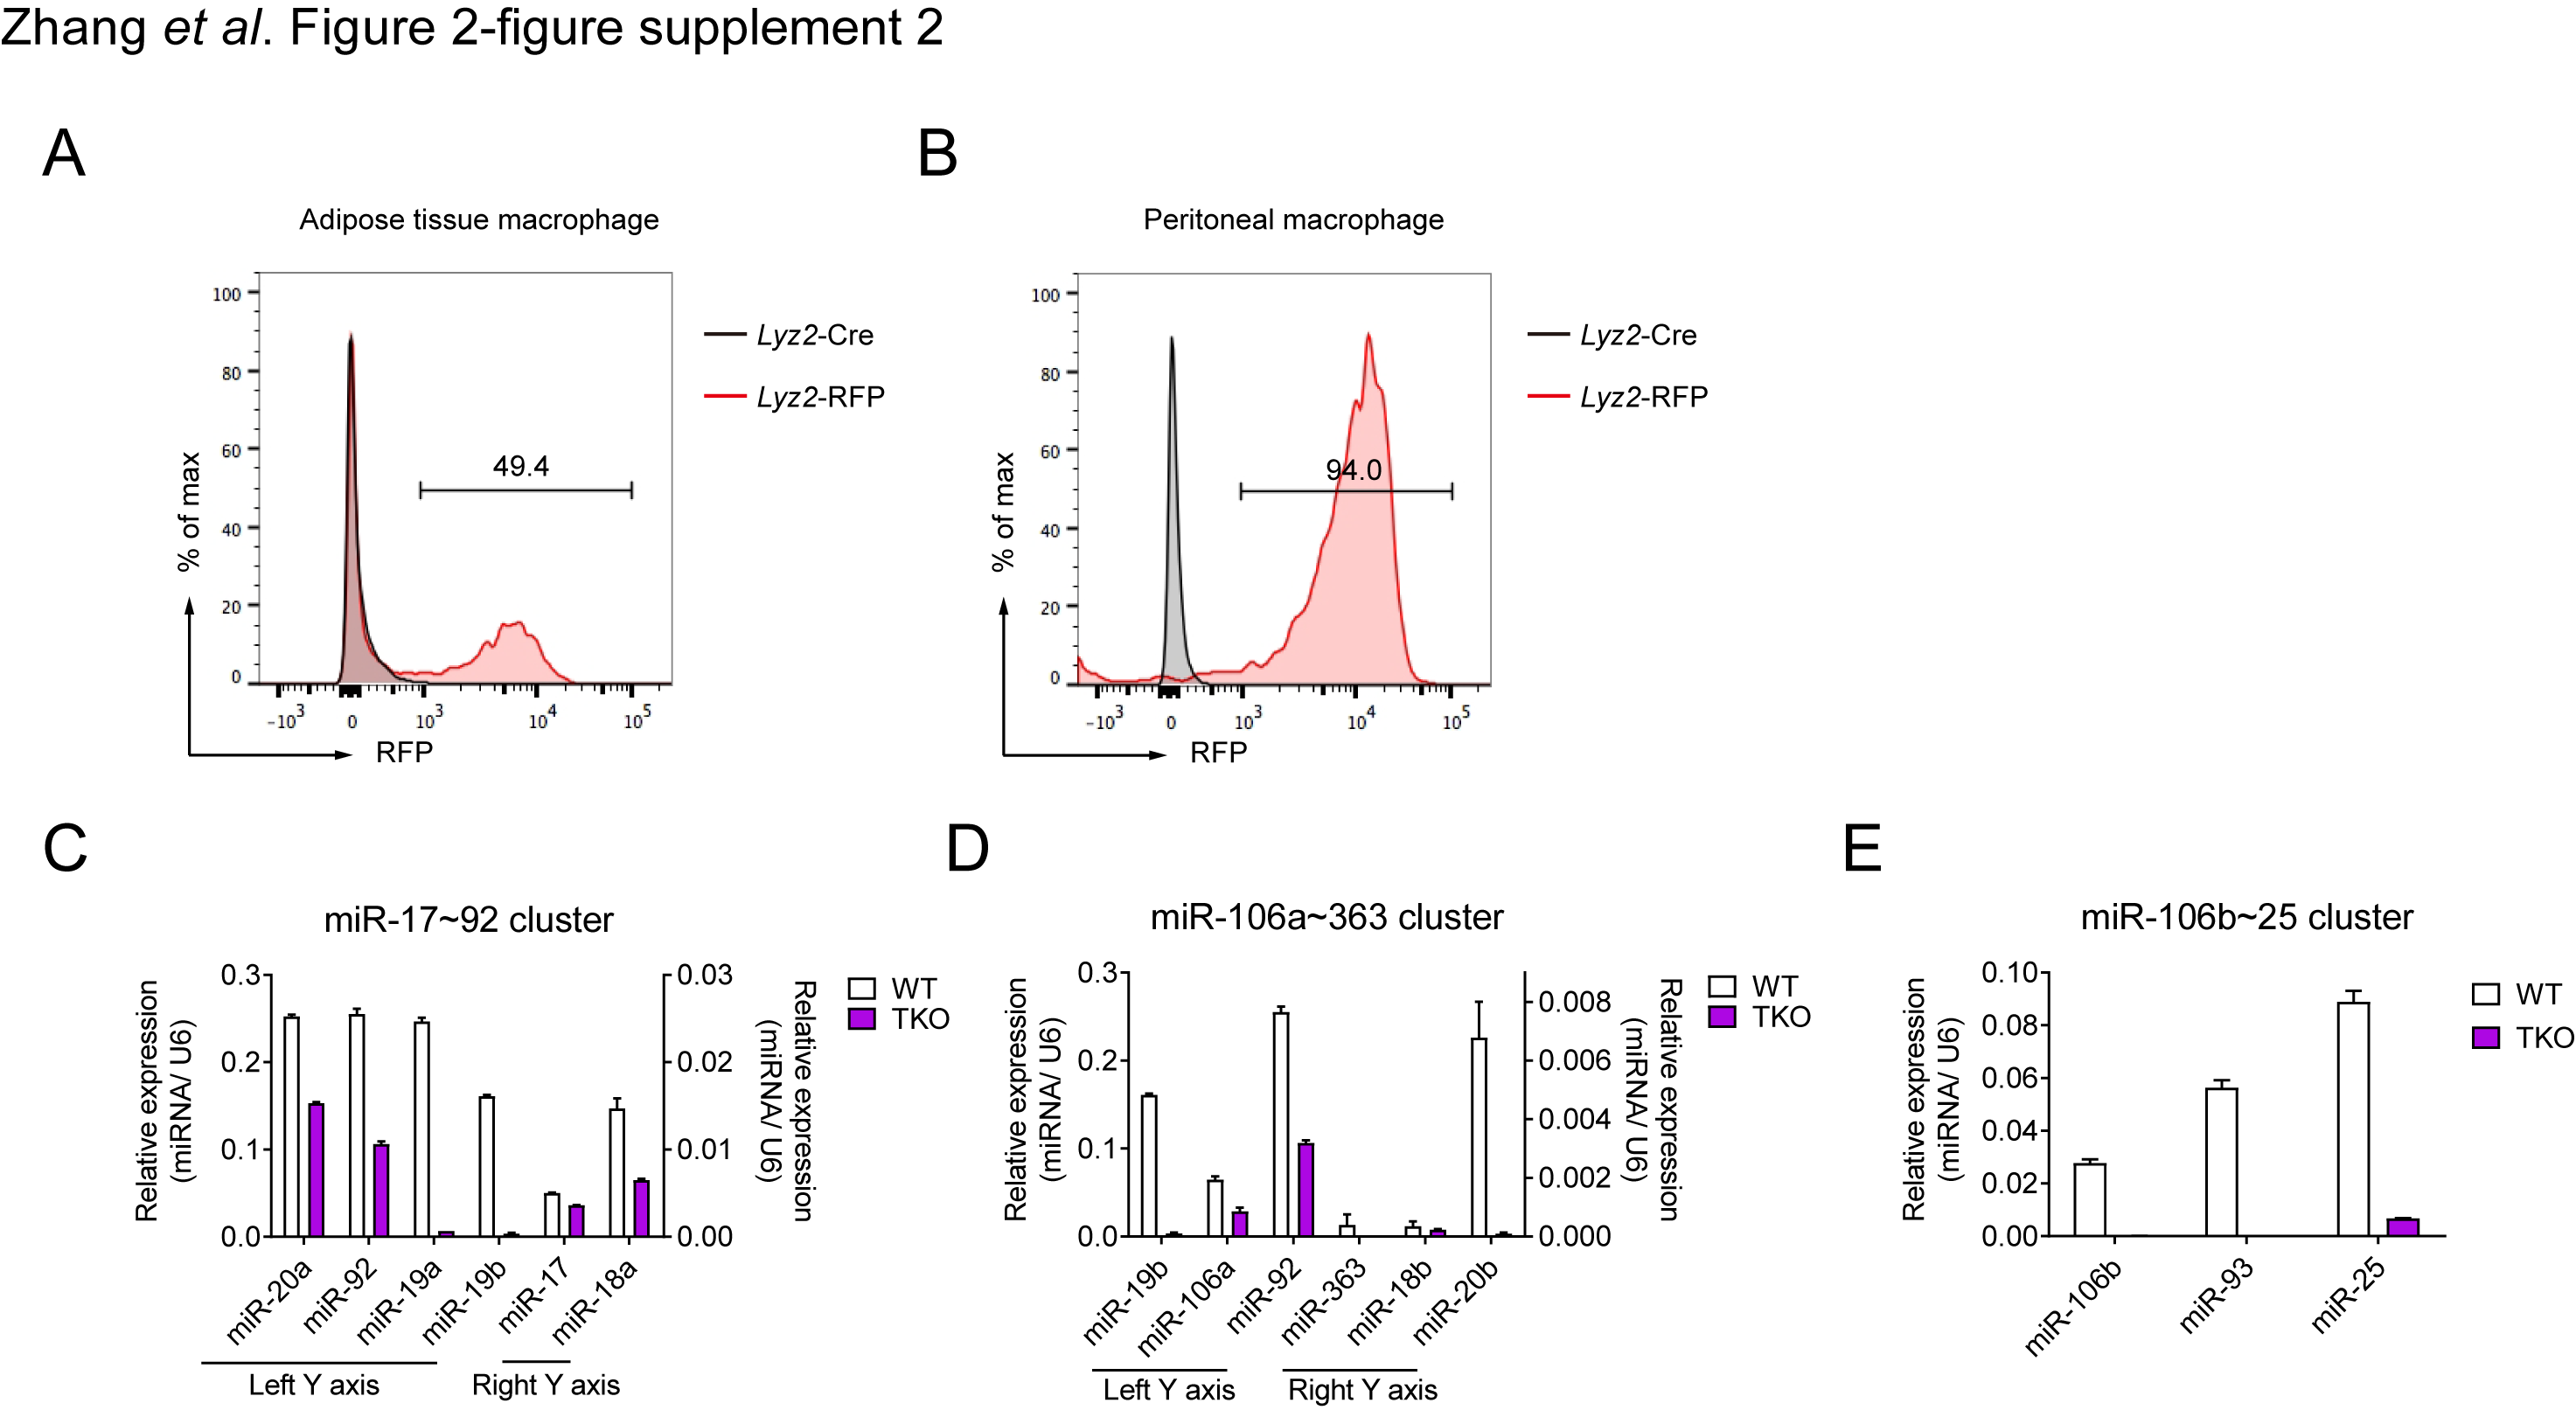

Supplement: supp [file elife-55676-supp-v1.zip › elife_poa_e55676_Figure_2_figure_supplement_2.tif]

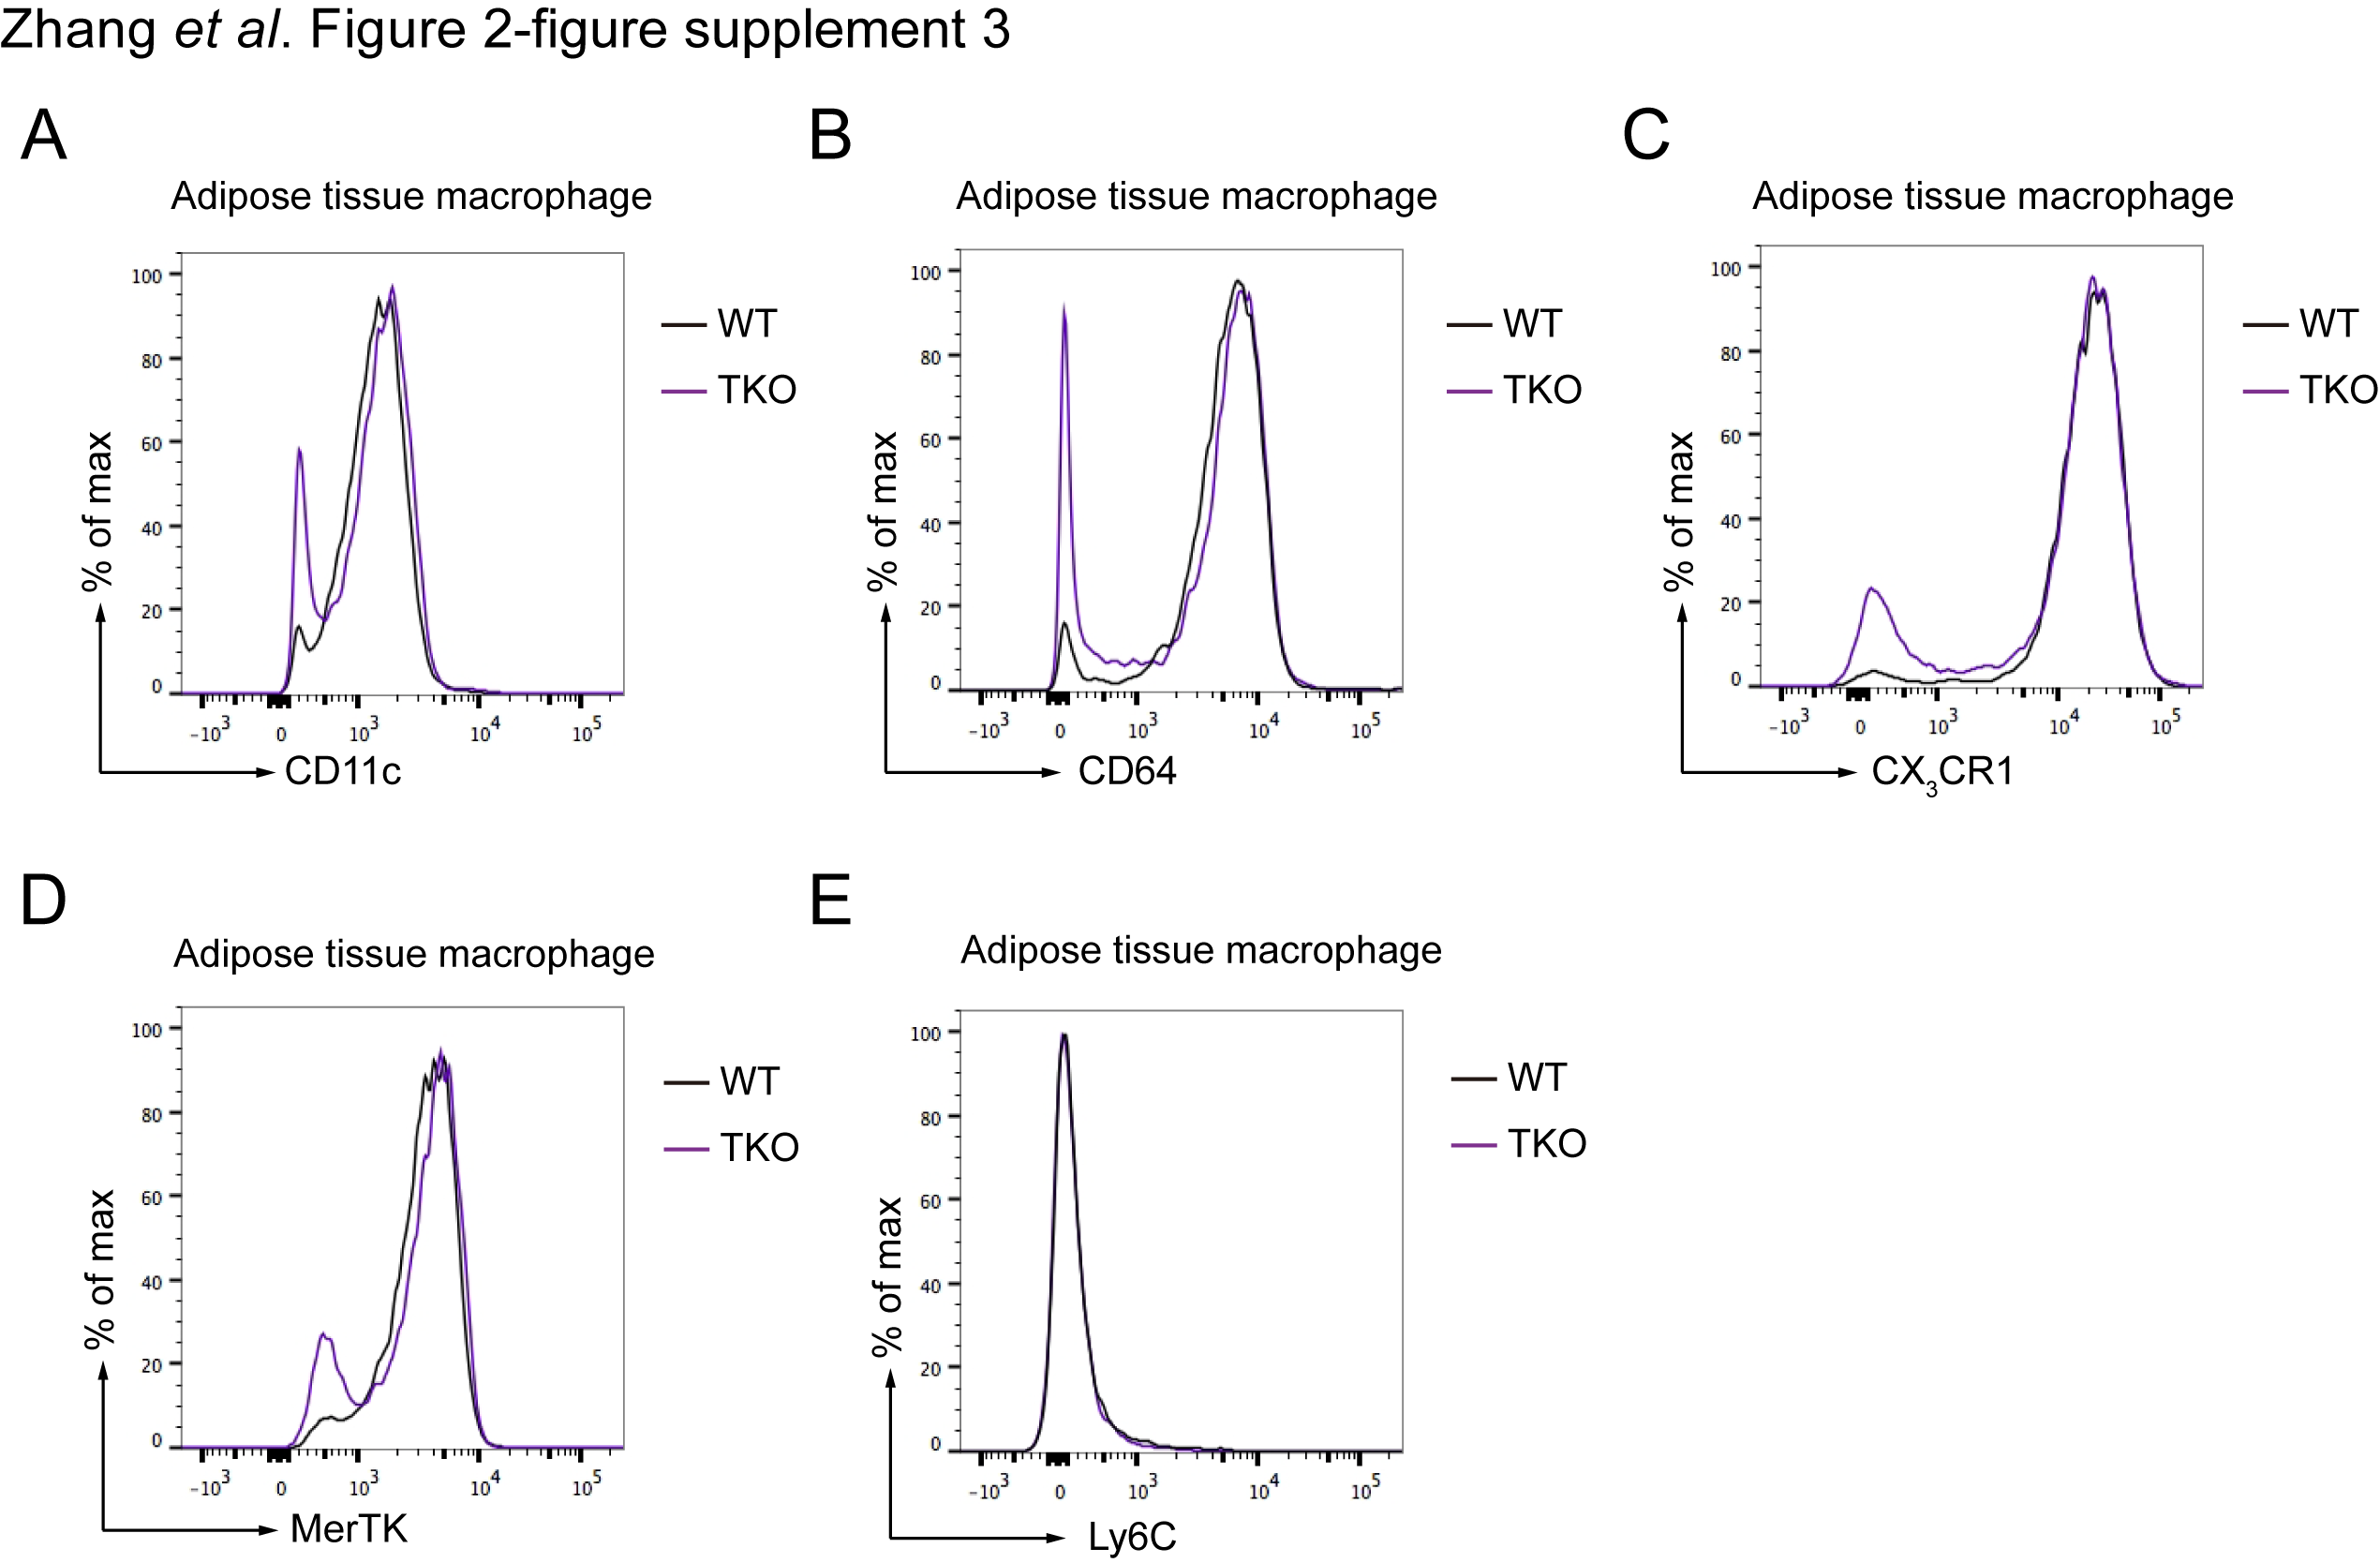

Supplement: supp [file elife-55676-supp-v1.zip › elife_poa_e55676_Figure_2_figure_supplement_3.tif]

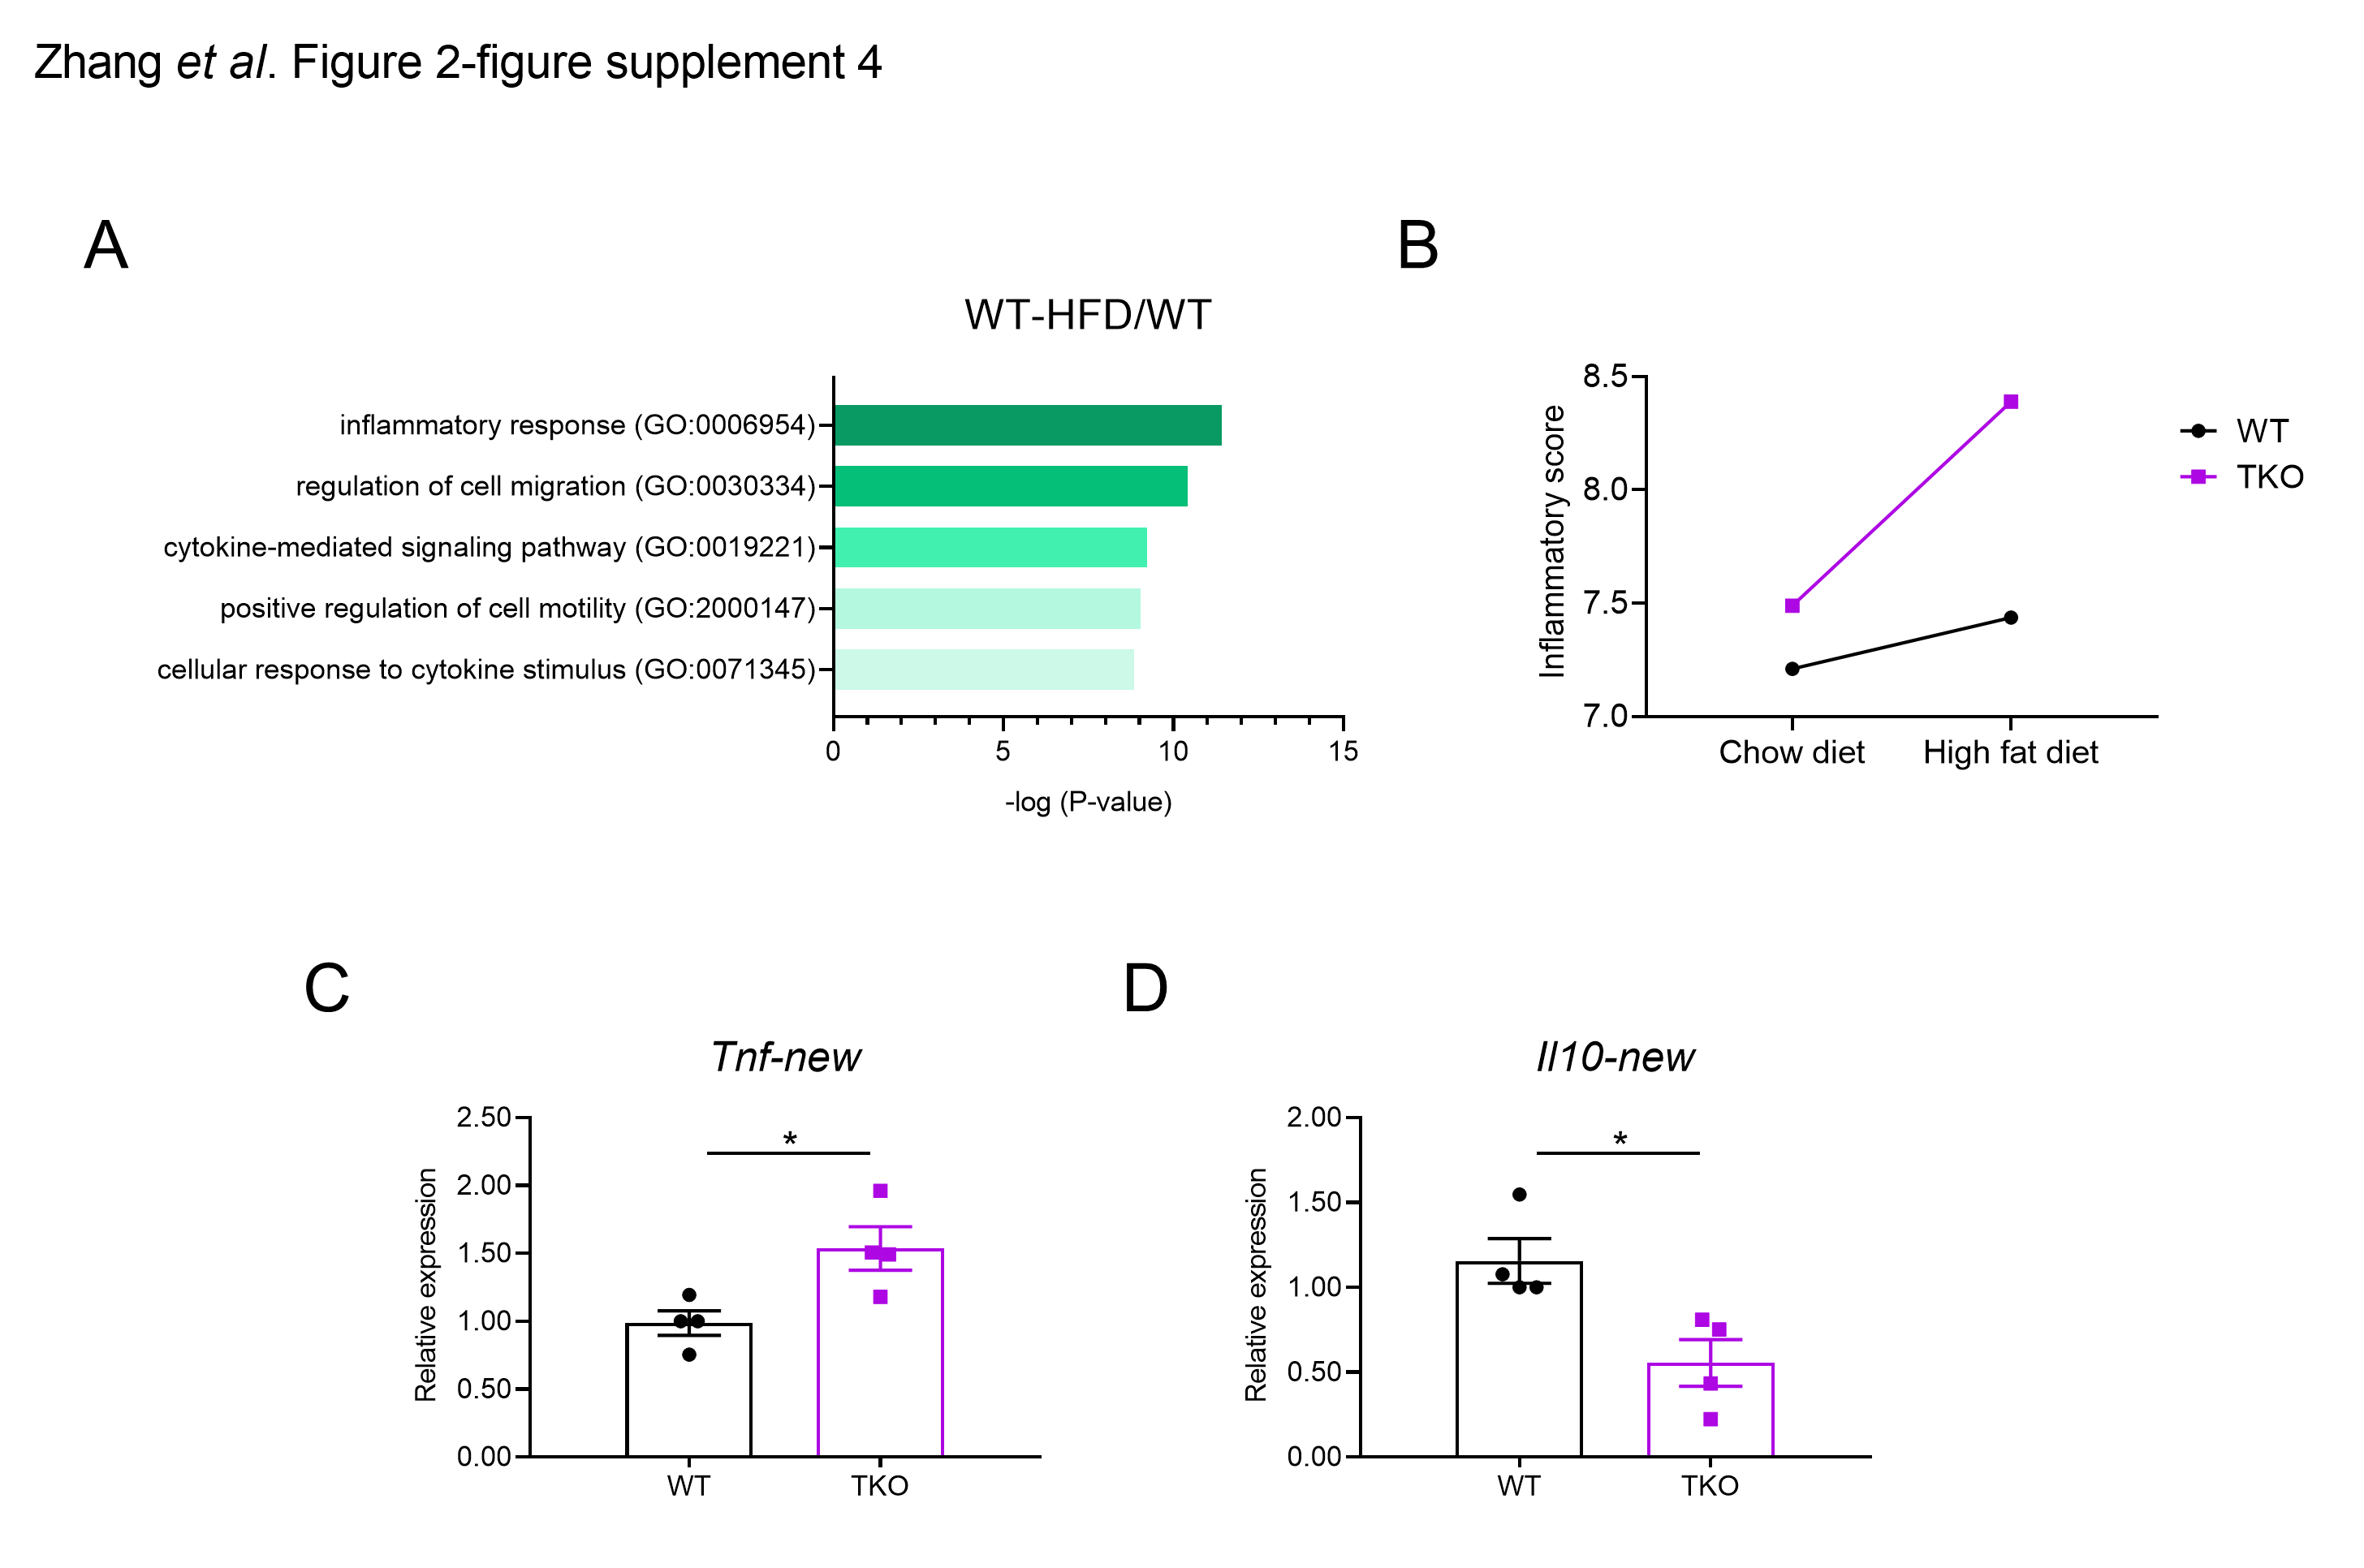

Supplement: supp [file elife-55676-supp-v1.zip › elife_poa_e55676_Figure_2_figure_supplement_4.tif]

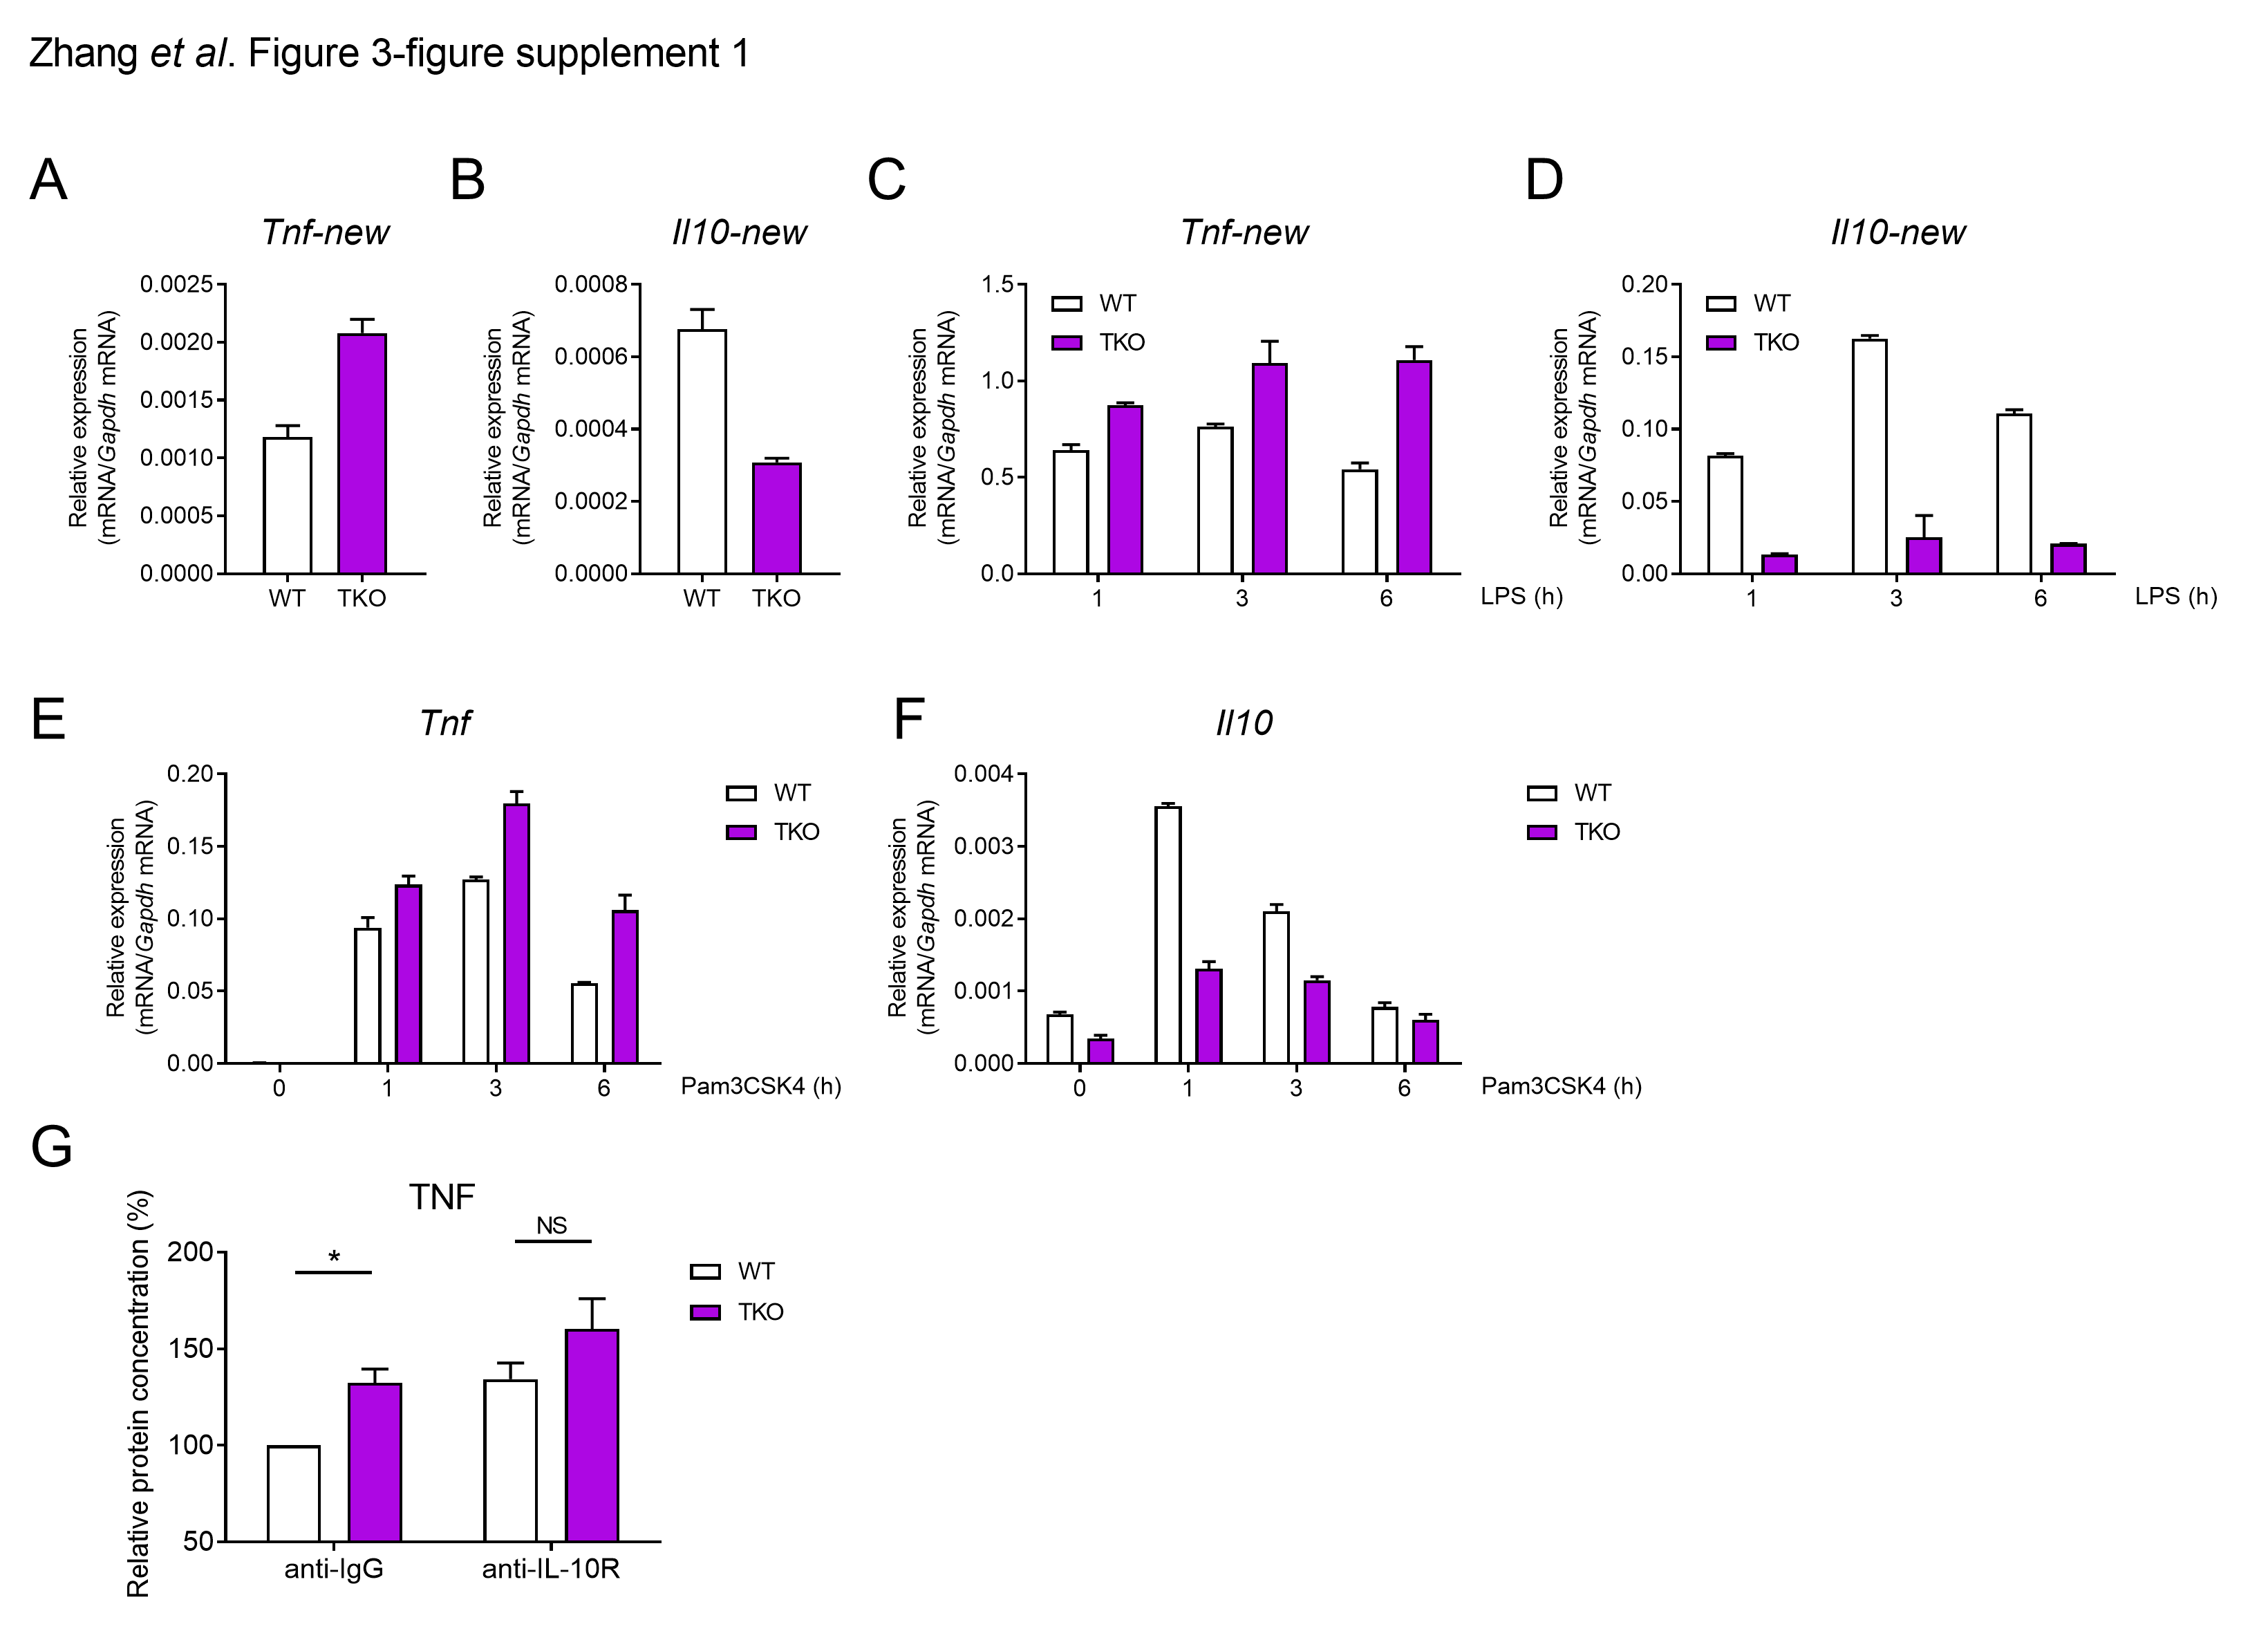

Supplement: supp [file elife-55676-supp-v1.zip › elife_poa_e55676_Figure_3_figure_supplement_1.tif]

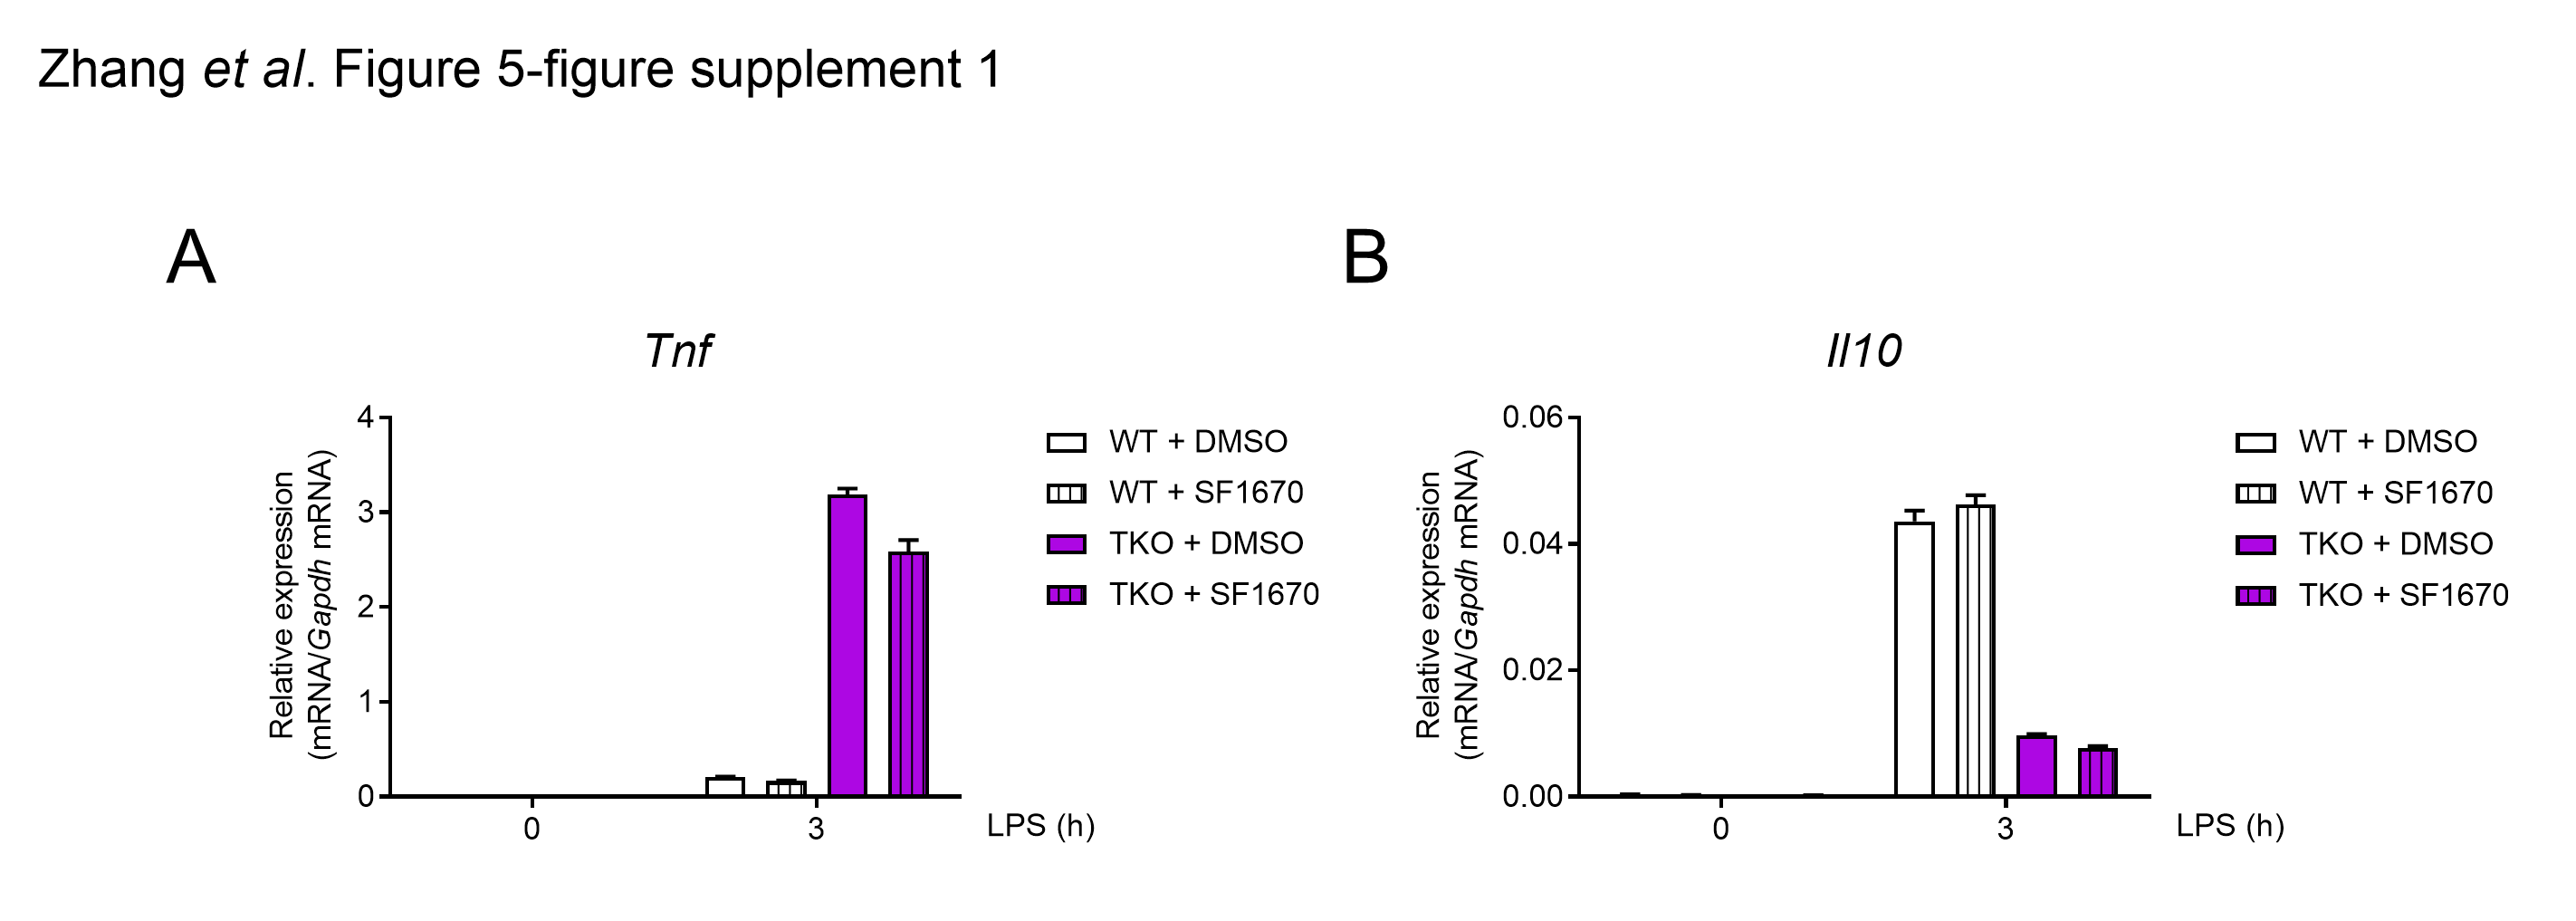

Supplement: supp [file elife-55676-supp-v1.zip › elife_poa_e55676_Figure_5_figure_supplement_1.tif]

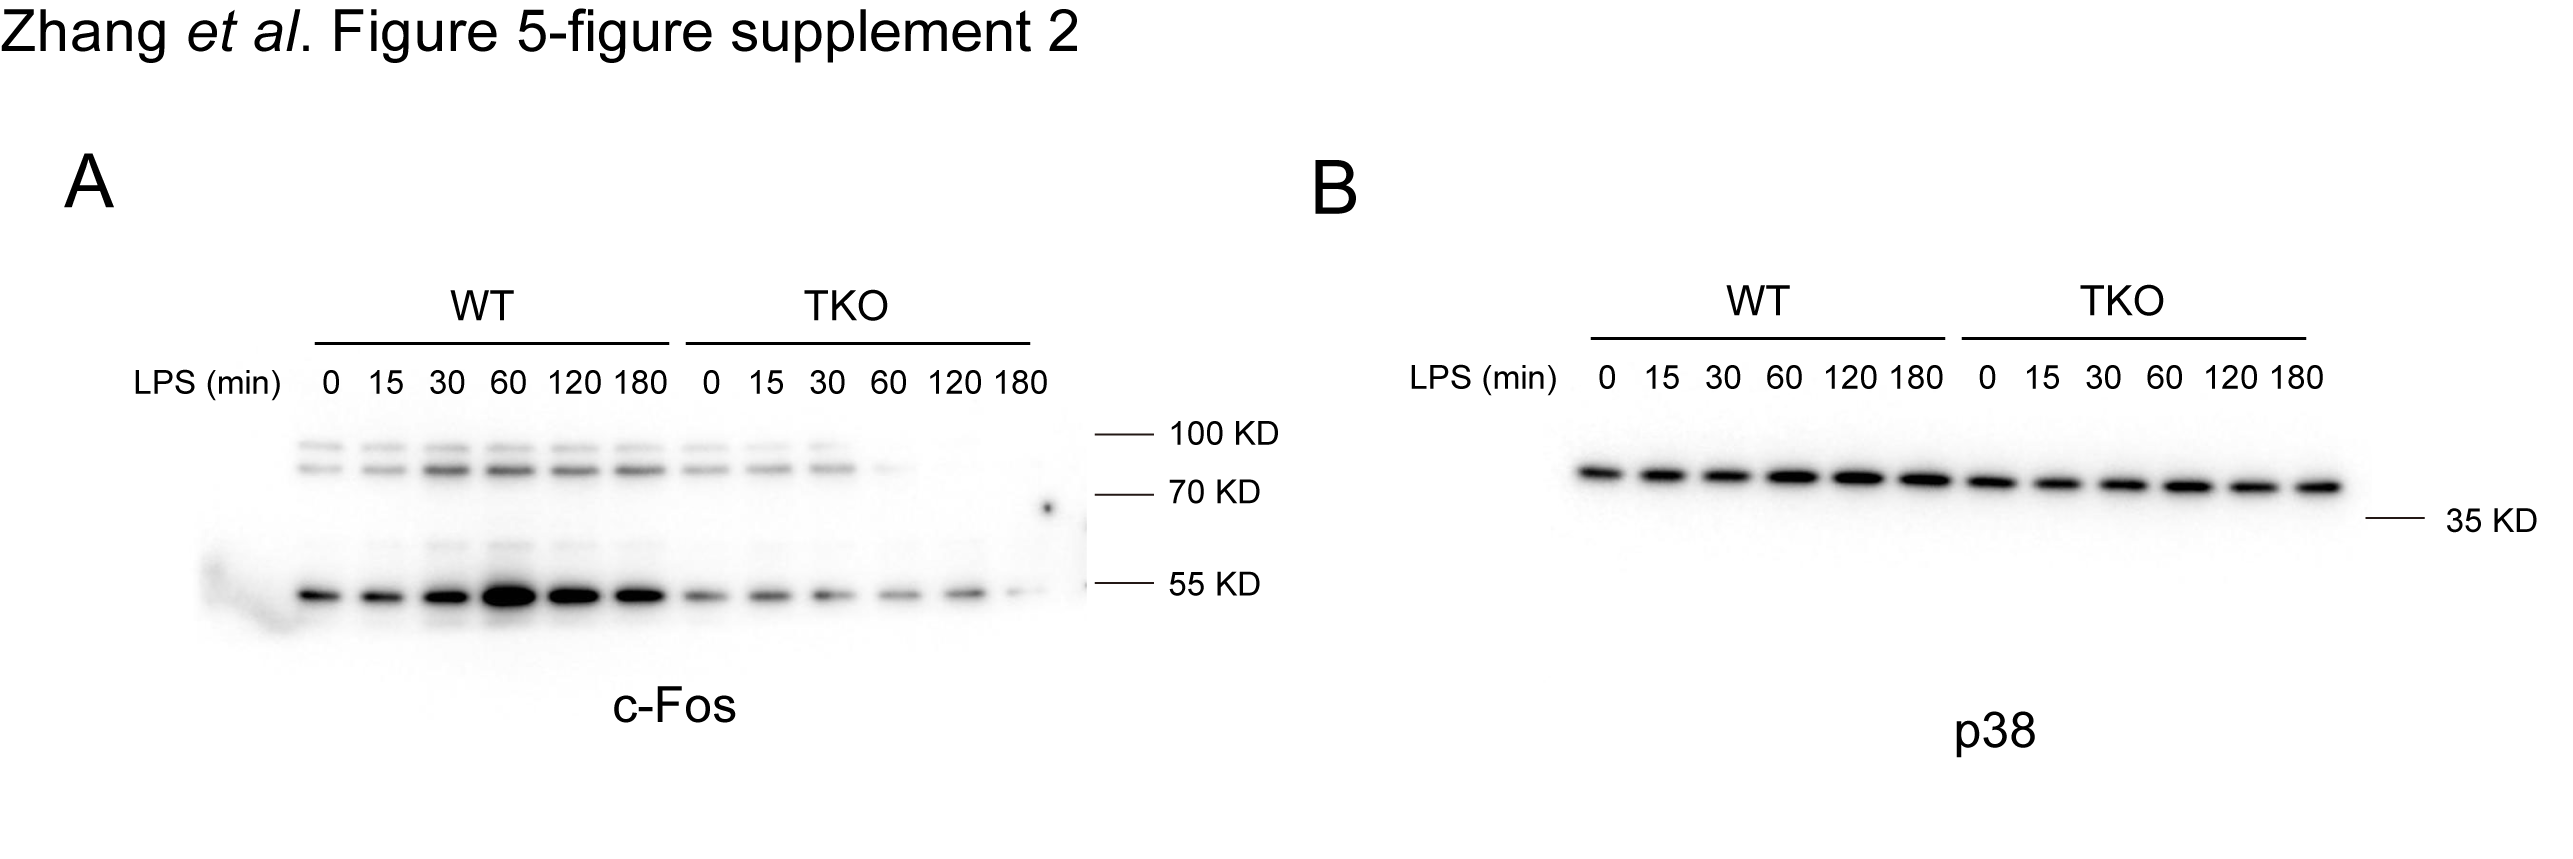

Supplement: supp [file elife-55676-supp-v1.zip › elife_poa_e55676_Figure_5_figure_supplement_2.tif]

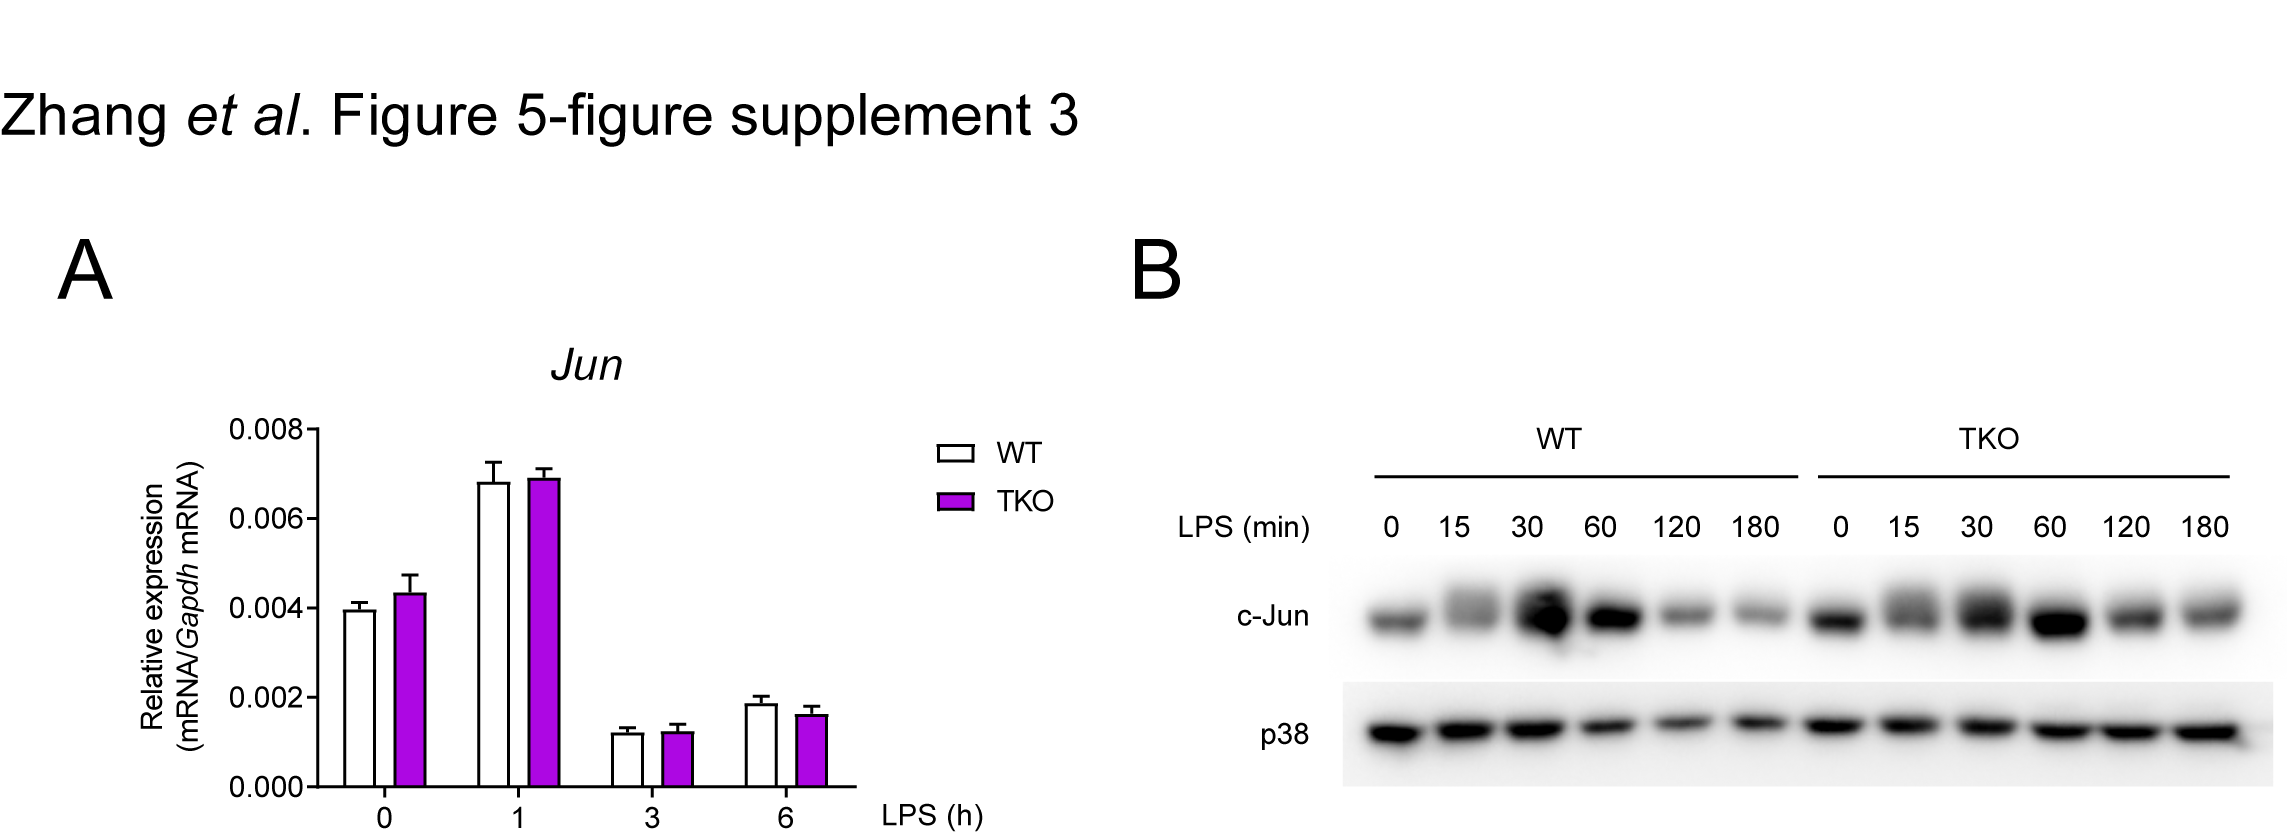

Supplement: supp [file elife-55676-supp-v1.zip › elife_poa_e55676_Figure_5_figure_supplement_3.tif]

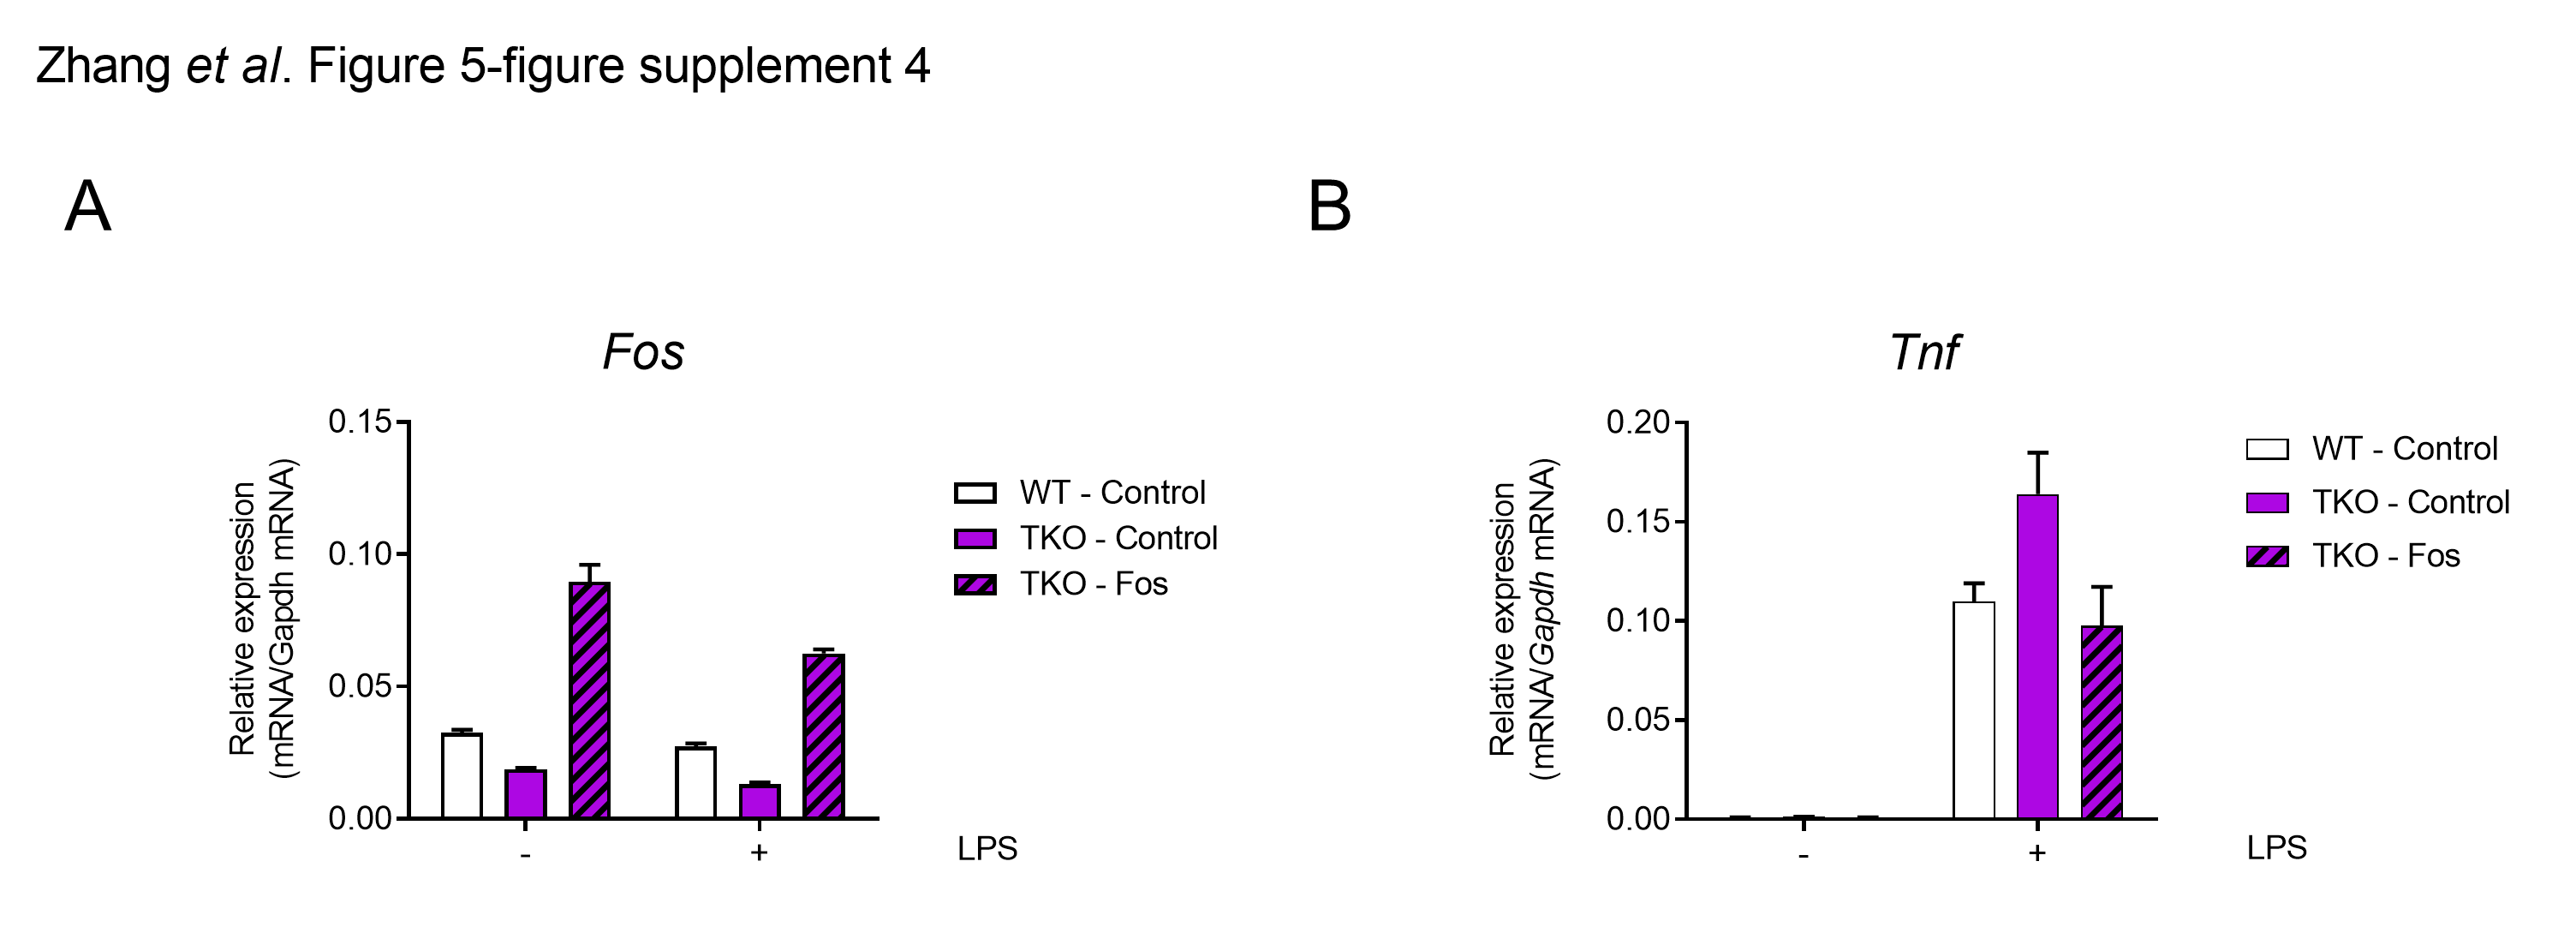

Supplement: supp [file elife-55676-supp-v1.zip › elife_poa_e55676_Figure_5_figure_supplement_4.tif]

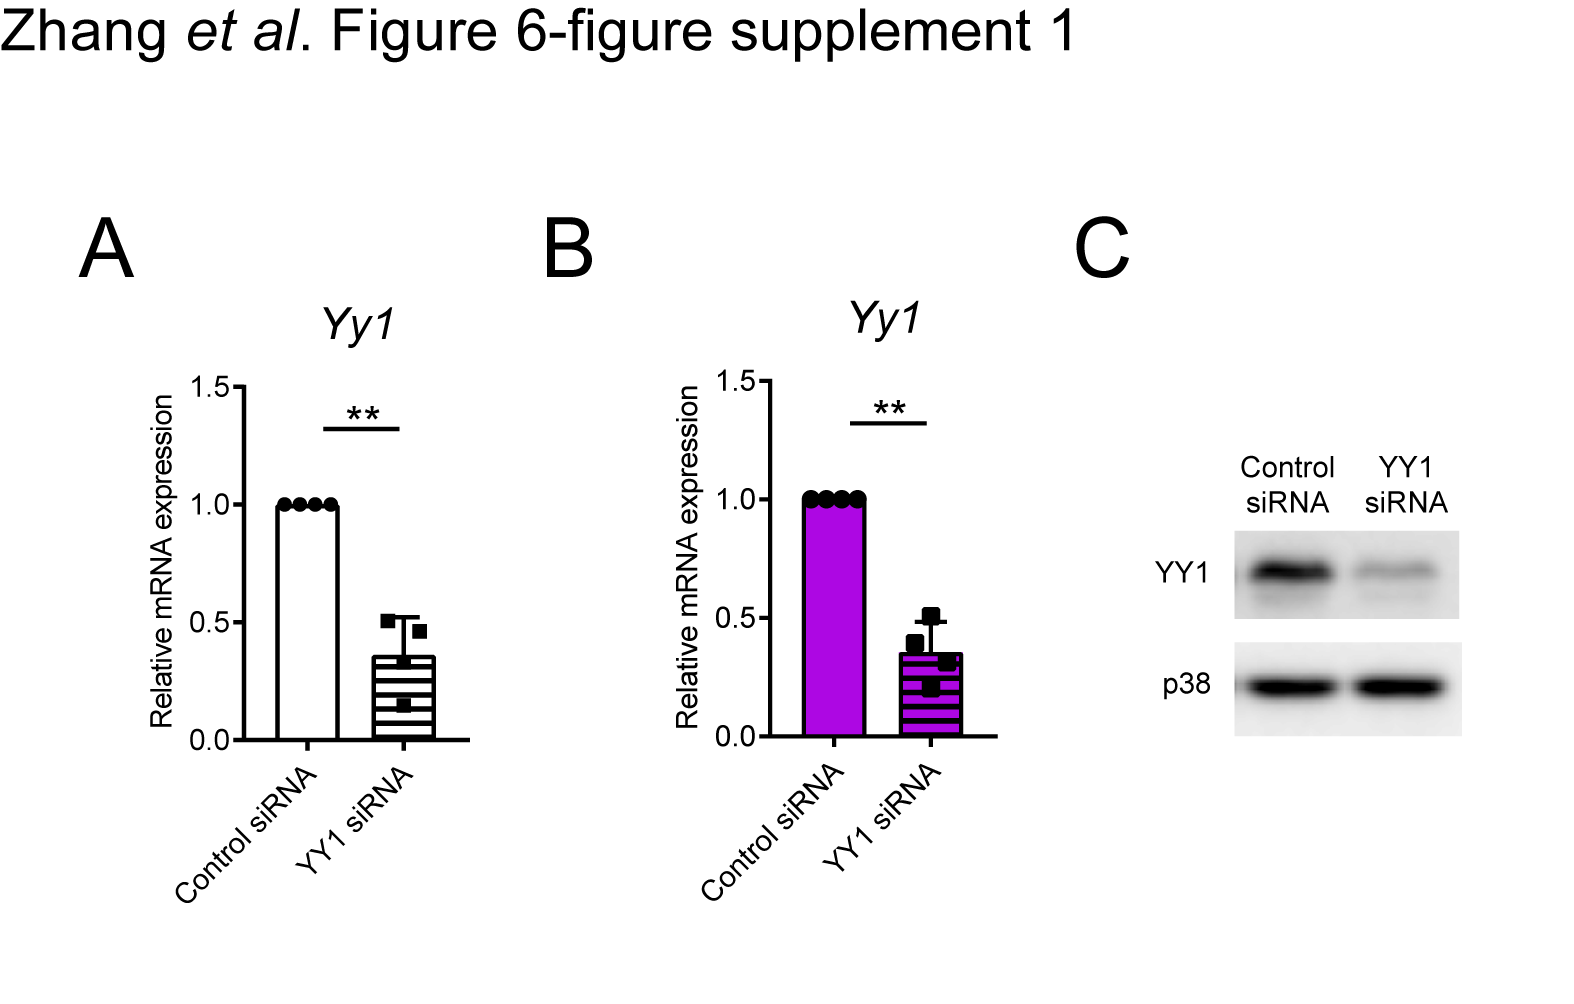

Supplement: supp [file elife-55676-supp-v1.zip › elife_poa_e55676_Figure_6_figure_supplement_1.tif]

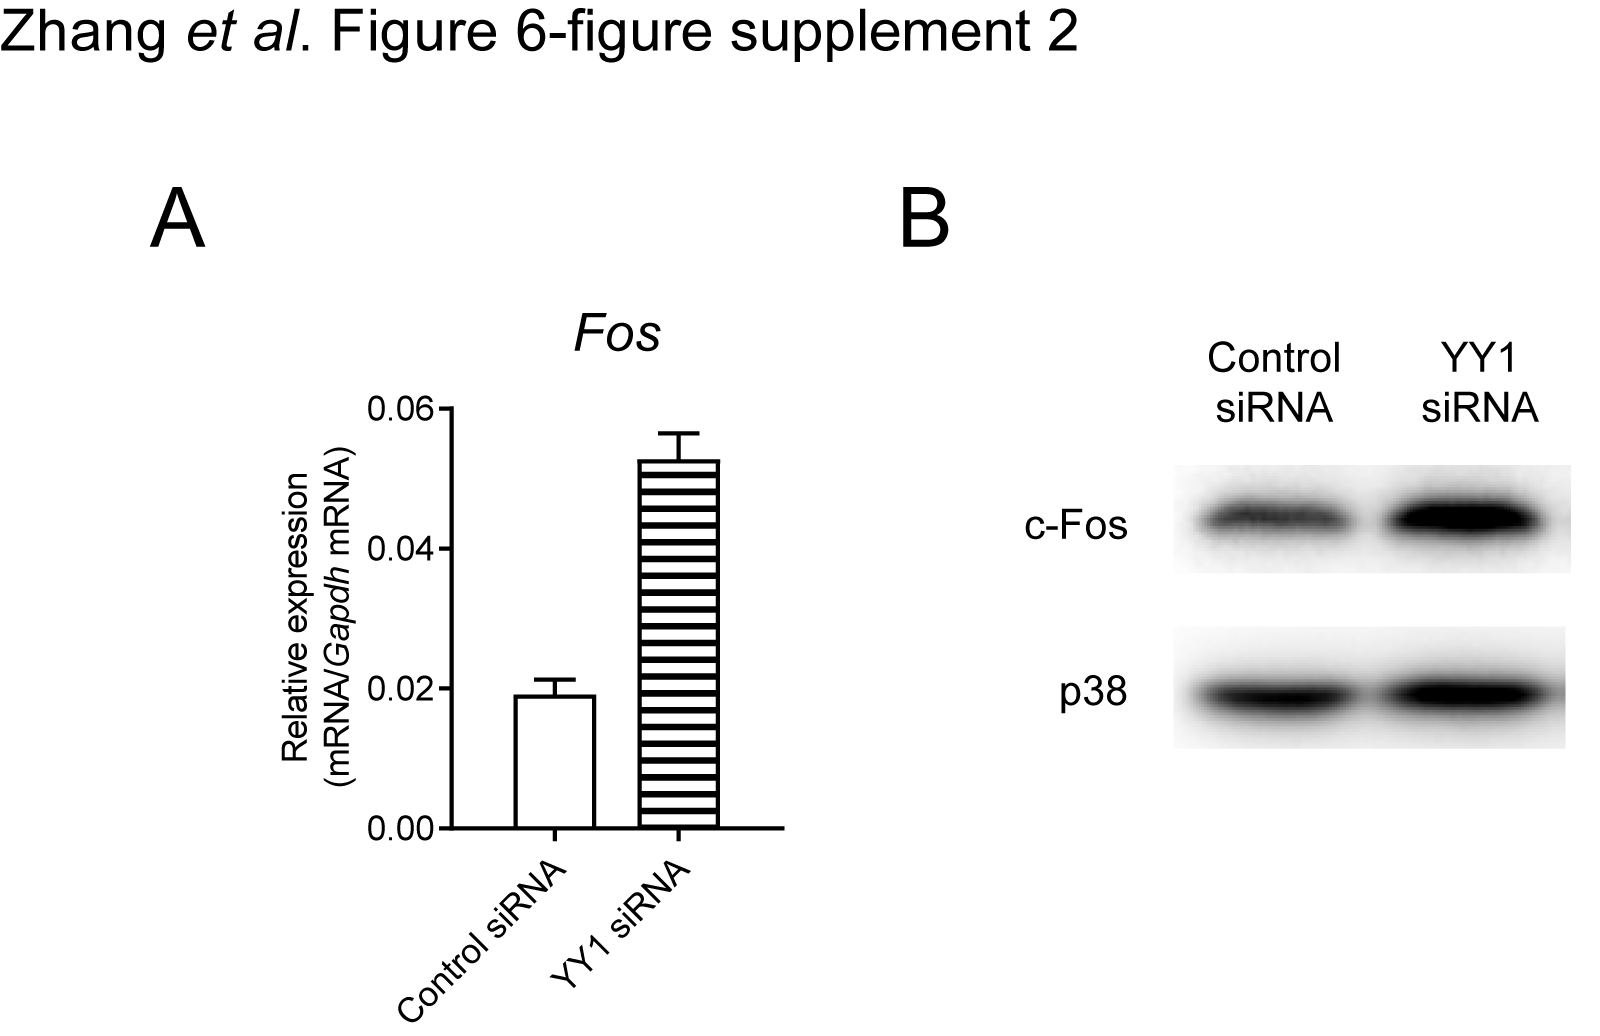

Supplement: supp [file elife-55676-supp-v1.zip › elife_poa_e55676_Figure_6_figure_supplement_2.tif]

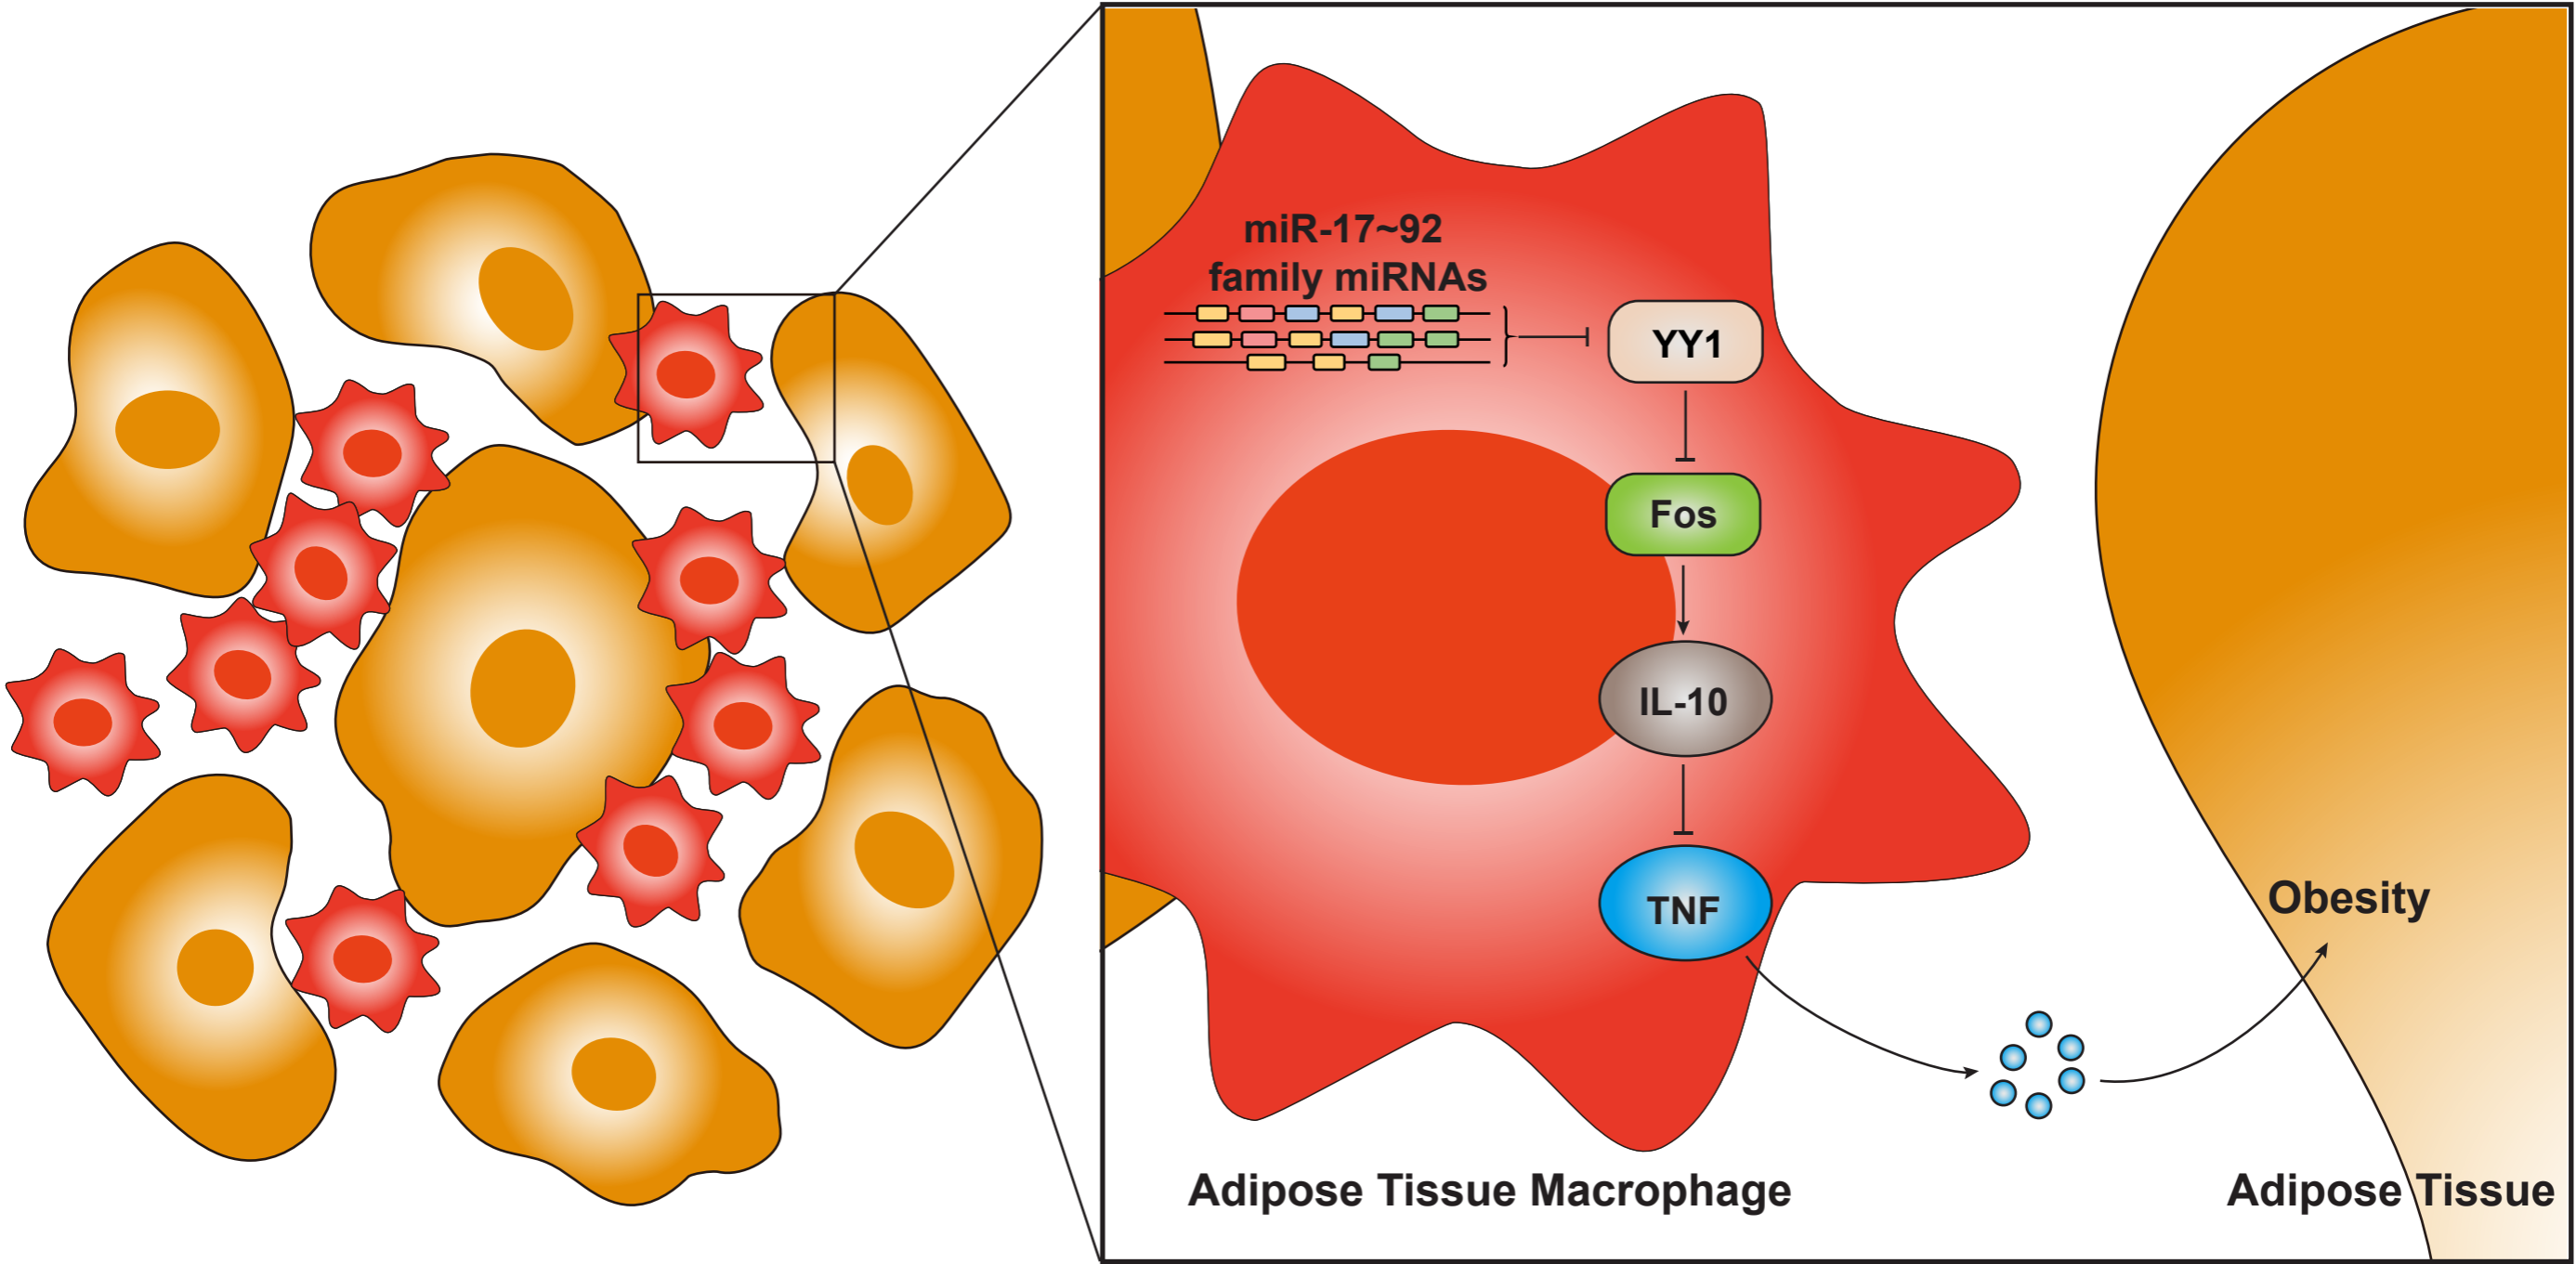

Supplement: supp [file elife-55676-supp-v1.zip › elife_poa_e55676_Figure_6_figure_supplement_3.pdf]
